# Supplementary material
Source: PubMed Central journal article supplement (PMC6647362)

## Supplementary Online Content

Childers CP, Dworsky JQ, Russell MM, Maggard-Gibbons M. Association of work measures and specialty with assigned work relative value units among surgeons. *JAMA Surg*. Published online July 17, 2019. doi:10.1001/jamasurg.2019.2295

**eTable 1.** Bivariate Associations

**eTable 2.** Building Multivariate Model Including Variable Transformations

**eTable 3.** Testing Potential Interactions

**eTable 4.** Full List of Included Procedures With Actual and Predicted Work Relative Value Units

**eFigure 1.** Changing the Sample Size Threshold Required to Include a Procedure in the Regression Model

**eFigure 2.** Negative Binomial Regression

This supplementary material has been provided by the authors to give readers additional information about their work.

**eTable 1. Bivariate Associations**

| Variable                        | Transformation    | Model 1  | Model 2    | Model 3   | Model 4   | Model 5   | Model 6   | Model 7   | Model 8   |
|---------------------------------|-------------------|----------|------------|-----------|-----------|-----------|-----------|-----------|-----------|
| Median Operative Time (Minutes) | None              | 0.141*** |            |           |           |           |           |           |           |
|                                 | Demeaned          |          | 0.154***   |           |           |           |           |           |           |
|                                 | Demeaned, squared |          | -0.0001*** |           |           |           |           |           |           |
| Median Postoperative LOS (Days) | None              |          |            | 2.758***  |           |           |           |           |           |
|                                 | Demeaned          |          |            |           | 3.409***  |           |           |           |           |
|                                 | Demeaned, squared |          |            |           | -0.216*** |           |           |           |           |
| Reoperation Rate(%)             | None              |          |            |           |           | 0.959***  |           |           |           |
|                                 | Demeaned          |          |            |           |           |           | 1.532***  |           |           |
|                                 | Demeaned, squared |          |            |           |           |           | -0.087*** |           |           |
| Readmission Rate (%)            | None              |          |            |           |           |           |           | 0.843***  |           |
|                                 | Demeaned          |          |            |           |           |           |           |           | 1.012***  |
|                                 | Demeaned, squared |          |            |           |           |           |           |           | -0.029**  |
| Constant                        |                   | 3.106*** | 16.812***  | 10.742*** | 17.411*** | 12.964*** | 17.379*** | 11.340*** | 16.982*** |
| R Squared                       |                   | 0.735    | 0.744      | 0.395     | 0.419     | 0.116     | 0.149     | 0.171     | 0.182     |
| AIC                             |                   | 4445.335 | 4423.78    | 5044.793  | 5018.534  | 5320.9    | 5294.851  | 5273.704  | 5266.449  |
| BIC                             |                   | 4454.511 | 4437.542   | 5053.968  | 5032.297  | 5330.075  | 5308.613  | 5282.879  | 5280.212  |

\* p<0.05 \*\* p<0.01 \*\*\* p<0.001

AIC = Akaike's Information Criterion; BIC = Bayesian (Schwarz) Information Criterion

**eTable 2.** Building Multivariate Model Including Variable Transformations

| Variable                        | Transformation    | Model 9  | Model 10  | Model 11  | Model 12  | <b>Model 13</b>  |
|---------------------------------|-------------------|----------|-----------|-----------|-----------|------------------|
| Median Operative Time (Minutes) | None              | 0.119*** |           |           |           |                  |
|                                 | Demeaned          |          | 0.132***  | 0.132***  | 0.132***  | <b>0.131***</b>  |
|                                 | Demeaned, squared |          | -0.000*** | -0.000*** | -0.000*** | <b>-0.000***</b> |
| Median Postoperative LOS (Days) | None              | 1.409*** | 1.382***  |           | 1.328***  | <b>1.297***</b>  |
|                                 | Demeaned          |          |           | 1.351***  |           |                  |
|                                 | Demeaned, squared |          |           | 0.008     |           |                  |
| Reoperation Rate(%)             | None              | -0.212** | -0.183*   | -0.186*   |           |                  |
|                                 | Demeaned          |          |           |           | 0.054     | <b>-0.047</b>    |
|                                 | Demeaned, squared |          |           |           | -0.025**  | <b>-0.016</b>    |
| Readmission Rate (%)            | None              | -0.033   | -0.019    | -0.012    | -0.068    |                  |
|                                 | Demeaned          |          |           |           |           | <b>0.036</b>     |
|                                 | Demeaned, squared |          |           |           |           | <b>-0.012*</b>   |
| Constant                        |                   | 3.283*** | 14.806*** | 17.523*** | 14.896*** | <b>14.664***</b> |
| R Squared                       |                   | 0.789    | 0.798     | 0.798     | 0.8       | <b>0.802</b>     |
| AIC                             |                   | 4287.044 | 4256.56   | 4258.479  | 4249.935  | <b>4247.596</b>  |
| BIC                             |                   | 4309.981 | 4284.085  | 4290.592  | 4282.048  | <b>4284.297</b>  |

\* p<0.05 \*\* p<0.01 \*\*\* p<0.001

AIC = Akaike's Information Criterion; BIC = Bayesian (Schwarz) Information Criterion  
 Model 13 was the final model

**eTable 3. Testing Potential Interactions**

| Variable                              |                                       | Model 14  | Model 15  | Model 16 | Model 17 | Model 18 |
|---------------------------------------|---------------------------------------|-----------|-----------|----------|----------|----------|
| Median Operative Time                 |                                       | 0.109***  | 0.102***  |          |          | 0.095*** |
| Median Postoperative LOS (Days)       |                                       |           |           | 4.052*** | 4.784*** | 0.882*   |
| Reoperation Quartile                  | 1                                     | Reference |           |          |          |          |
|                                       | 2                                     | -1.34     |           | 1.413    |          | 0.039    |
|                                       | 3                                     | -0.192    |           | 1.462    |          | -0.235   |
|                                       | 4                                     | 1.501     |           | 0.483    |          | -1.232   |
|                                       | Readmission Quartile                  | 1         | Reference |          |          |          |
|                                       | 2                                     |           | 1.042     |          | 2.913**  | 0.977    |
|                                       | 3                                     |           | 0.384     |          | 4.633*** | -1.222   |
|                                       | 4                                     |           | 1.153     |          | -0.577   | -1.347   |
| Reoperation Quartile * Operative Time | 1                                     | Reference |           |          |          |          |
|                                       | 2                                     | 0.035**   |           |          |          |          |
|                                       | 3                                     | 0.029*    |           |          |          |          |
|                                       | 4                                     | 0.028**   |           |          |          |          |
|                                       | Readmission Quartile * Operative Time | 1         | Reference |          |          |          |
|                                       | 2                                     |           | 0.013     |          |          | 0.004    |
|                                       | 3                                     |           | 0.045***  |          |          | 0.037**  |
|                                       | 4                                     |           | 0.036**   |          |          | 0.027*   |
| Reoperation Quartile * LOS            | 1                                     | Reference |           |          |          |          |
|                                       | 2                                     |           |           | -0.473   |          | 0.382    |
|                                       | 3                                     |           |           | -0.607   |          | 0.374    |
|                                       | 4                                     |           |           | -1.425*  |          | 0.349    |
|                                       | Readmission Quartile * LOS            | 1         | Reference |          |          |          |
|                                       | 2                                     |           |           |          | -1.956   |          |
|                                       | 3                                     |           |           |          | -2.581*  |          |
|                                       | 4                                     |           |           |          | -1.727   |          |
| Constant                              |                                       | 3.802***  | 3.609***  | 9.343*** | 8.944*** | 3.825*** |
| R Squared                             |                                       | 0.752     | 0.764     | 0.42     | 0.419    | 0.796    |
| AIC                                   |                                       | 4408.961  | 4374.719  | 5027.14  | 5028.463 | 4280.877 |
| BIC                                   |                                       | 4445.661  | 4411.42   | 5063.84  | 5065.163 | 4349.69  |

\* p<0.05 \*\* p<0.01 \*\*\* p<0.001

AIC = Akaike's Information Criterion; BIC = Bayesian (Schwarz) Information Criterion

**eTable 4.** Full List of Included Procedures With Actual and Predicted Work Relative Value Units

\*\*Procedures are ranked first by specialty and then from lowest (most negative) to highest standardized residual

| CPT Code | CPT Description              | Median operative time | Median postoperative LOS | Reoperation rate | Readmission rate | Specialty       | Actual RVU | Predicted RVU |
|----------|------------------------------|-----------------------|--------------------------|------------------|------------------|-----------------|------------|---------------|
| 33533    | Cabg arterial single         | 208                   | 6                        | 5.3%             | 12.6%            | Cardiac Surgery | 33.75      | 35.46         |
| 33405    | Replacement aortic valve opn | 211                   | 6                        | 7.3%             | 8.5%             | Cardiac Surgery | 41.32      | 35.62         |
| 35301    | Rechanneling of artery       | 75                    | 1                        | 2.8%             | 10.5%            | Cardiac Surgery | 21.16      | 13.70         |
| 33361    | Replace aortic valve perq    | 78.5                  | 2                        | 4.2%             | 10.2%            | Cardiac Surgery | 25.13      | 15.19         |
| 33430    | Replacement of mitral valve  | 233                   | 8                        | 10.2%            | 9.0%             | Cardiac Surgery | 50.93      | 40.11         |
| 33410    | Replacement aortic valve opn | 186                   | 6                        | 7.5%             | 5.6%             | Cardiac Surgery | 46.41      | 32.87         |
| 45111    | Partial removal of rectum    | 172                   | 5                        | 10.2%            | 13.1%            | General Surgery | 18.01      | 29.18         |
| 49568    | Hernia repair w/mesh         | 82                    | 1                        | 3.6%             | 5.4%             | General Surgery | 4.88       | 14.49         |
| 11006    | Debride genit/per/abdom wall | 51                    | 10                       | 8.5%             | 7.8%             | General Surgery | 13.10      | 22.22         |
| 60540    | Explore adrenal gland        | 152                   | 4                        | 3.5%             | 5.0%             | General Surgery | 18.02      | 26.79         |
| 19318    | Reduction of large breast    | 174.5                 | 0                        | 2.6%             | 3.1%             | General Surgery | 16.03      | 24.66         |
| 27882    | Amputation of lower leg      | 38                    | 9                        | 12.5%            | 8.7%             | General Surgery | 9.79       | 17.37         |
| 47610    | Removal of gallbladder       | 154                   | 5                        | 2.0%             | 12.1%            | General Surgery | 20.92      | 28.47         |
| 50546    | Laparoscopic nephrectomy     | 185                   | 3                        | 0.7%             | 6.7%             | General Surgery | 21.87      | 29.39         |
| 43117    | Partial removal of esophagus | 324                   | 10                       | 10.9%            | 10.2%            | General Surgery | 43.65      | 50.53         |
| 11004    | Debride genitalia & perineum | 36                    | 9                        | 10.9%            | 8.8%             | General Surgery | 10.80      | 17.63         |
| 44110    | Excise intestine lesion(s)   | 93                    | 5                        | 4.6%             | 6.6%             | General Surgery | 14.04      | 20.80         |
| 11043    | Deb musc/fascia 20 sq cm/<   | 24                    | 4                        | 6.4%             | 11.0%            | General Surgery | 2.70       | 9.37          |
| 49322    | Laparoscopy aspiration       | 51                    | 3                        | 5.8%             | 13.3%            | General Surgery | 6.01       | 12.05         |
| 11000    | Debride infected skin        | 19                    | 3                        | 9.2%             | 13.5%            | General Surgery | 0.60       | 6.54          |
| 43332    | Transab esoph hiat hern rpr  | 139.5                 | 4                        | 3.3%             | 11.5%            | General Surgery | 19.62      | 25.44         |
| 58571    | Tlh w/t/o 250 g or less      | 129                   | 1                        | 3.3%             | 4.6%             | General Surgery | 15.00      | 20.53         |
| 48140    | Partial removal of pancreas  | 189                   | 5                        | 3.1%             | 16.1%            | General Surgery | 26.32      | 31.75         |
| 11042    | Deb subq tissue 20 sq cm/<   | 19                    | 2                        | 6.1%             | 9.2%             | General Surgery | 1.01       | 6.29          |
| 45110    | Removal of rectum            | 215.5                 | 6                        | 6.2%             | 14.3%            | General Surgery | 30.76      | 35.87         |
| 27886    | Amputation follow-up surgery | 58                    | 4                        | 4.5%             | 10.9%            | General Surgery | 10.02      | 14.65         |
| 44212    | Laparo total proctocolectomy | 274                   | 5                        | 5.6%             | 17.8%            | General Surgery | 34.58      | 39.10         |
| 47600    | Removal of gallbladder       | 110                   | 4                        | 2.7%             | 9.4%             | General Surgery | 17.48      | 21.89         |
| 11044    | Deb bone 20 sq cm/<          | 23                    | 4                        | 8.1%             | 14.7%            | General Surgery | 4.10       | 8.49          |
| 44125    | Removal of small intestine   | 95                    | 8                        | 9.1%             | 14.7%            | General Surgery | 20.03      | 24.37         |
| 56405    | I & d of vulva/perineum      | 16                    | 2                        | 5.4%             | 5.4%             | General Surgery | 1.49       | 5.76          |
| 49000    | Exploration of abdomen       | 64                    | 5                        | 6.1%             | 9.6%             | General Surgery | 12.54      | 16.69         |
| 44312    | Revision of ileostomy        | 63                    | 3                        | 3.8%             | 16.3%            | General Surgery | 9.43       | 13.50         |

|       |                              |       |   |       |       |                 |       |       |
|-------|------------------------------|-------|---|-------|-------|-----------------|-------|-------|
| 20005 | I&d abscess subfascial       | 18    | 3 | 3.5%  | 7.5%  | General Surgery | 3.58  | 7.54  |
| 47605 | Removal of gallbladder       | 125   | 3 | 2.6%  | 6.1%  | General Surgery | 18.48 | 22.44 |
| 44640 | Repair bowel-skin fistula    | 131   | 7 | 6.4%  | 13.6% | General Surgery | 24.20 | 28.10 |
| 38120 | Laparoscopy splenectomy      | 120   | 2 | 1.7%  | 8.9%  | General Surgery | 17.07 | 20.77 |
| 43333 | Transab esoph hiat hern rpr  | 146   | 3 | 1.5%  | 8.5%  | General Surgery | 21.46 | 25.10 |
| 49650 | Lap ing hernia repair init   | 61    | 0 | 0.5%  | 1.2%  | General Surgery | 6.36  | 9.94  |
| 44160 | Removal of colon             | 110   | 6 | 5.8%  | 11.0% | General Surgery | 20.89 | 24.31 |
| 49321 | Laparoscopy biopsy           | 50    | 0 | 2.1%  | 14.3% | General Surgery | 5.44  | 8.81  |
| 58150 | Total hysterectomy           | 124   | 2 | 0.8%  | 2.3%  | General Surgery | 17.31 | 20.66 |
| 21501 | Drain neck/chest lesion      | 17.5  | 3 | 5.9%  | 6.5%  | General Surgery | 3.98  | 7.17  |
| 43610 | Excision of stomach lesion   | 92    | 4 | 3.0%  | 7.7%  | General Surgery | 16.34 | 19.50 |
| 38570 | Laparoscopy lymph node biop  | 67    | 0 | 0.8%  | 10.4% | General Surgery | 8.49  | 11.59 |
| 19300 | Removal of breast tissue     | 49    | 0 | 1.9%  | 1.7%  | General Surgery | 5.31  | 8.35  |
| 60210 | Partial thyroid excision     | 83    | 1 | 1.1%  | 1.8%  | General Surgery | 11.23 | 14.16 |
| 45395 | Lap removal of rectum        | 241   | 4 | 4.3%  | 13.4% | General Surgery | 33.00 | 35.88 |
| 60240 | Removal of thyroid           | 110   | 1 | 1.2%  | 2.5%  | General Surgery | 15.04 | 17.86 |
| 43621 | Removal of stomach           | 245   | 8 | 5.3%  | 9.9%  | General Surgery | 39.53 | 42.21 |
| 45400 | Laparoscopic proc            | 131   | 2 | 2.7%  | 5.9%  | General Surgery | 19.44 | 22.00 |
| 60220 | Partial removal of thyroid   | 80    | 1 | 1.0%  | 1.8%  | General Surgery | 11.19 | 13.73 |
| 45005 | Drainage of rectal abscess   | 15    | 1 | 3.7%  | 3.7%  | General Surgery | 2.02  | 4.49  |
| 49651 | Lap ing hernia repair recur  | 66    | 0 | 0.8%  | 1.6%  | General Surgery | 8.38  | 10.76 |
| 49421 | Ins tun ip cath for dial opn | 38    | 0 | 8.7%  | 11.7% | General Surgery | 4.21  | 6.50  |
| 45540 | Correct rectal prolapse      | 107   | 3 | 1.3%  | 8.3%  | General Surgery | 18.12 | 20.26 |
| 44020 | Explore small intestine      | 64.5  | 6 | 5.7%  | 8.6%  | General Surgery | 16.22 | 18.23 |
| 49525 | Repair ing hernia sliding    | 65    | 0 | 0.8%  | 3.5%  | General Surgery | 8.93  | 10.94 |
| 38745 | Remove armpit lymph nodes    | 92    | 1 | 0.4%  | 4.9%  | General Surgery | 13.87 | 15.81 |
| 45505 | Repair of rectum             | 52    | 1 | 1.4%  | 5.0%  | General Surgery | 8.36  | 10.28 |
| 49002 | Reopening of abdomen         | 47    | 9 | 10.4% | 8.5%  | General Surgery | 17.63 | 19.42 |
| 27603 | Drain lower leg lesion       | 18    | 3 | 7.1%  | 12.2% | General Surgery | 5.23  | 7.00  |
| 49507 | Prp i/hern init block >5 yr  | 63    | 0 | 1.4%  | 3.7%  | General Surgery | 9.09  | 10.70 |
| 38100 | Removal of spleen total      | 97    | 5 | 4.9%  | 13.0% | General Surgery | 19.55 | 21.14 |
| 19304 | Mast subq                    | 54.5  | 0 | 4.4%  | 3.6%  | General Surgery | 7.95  | 9.36  |
| 25111 | Remove wrist tendon lesion   | 29    | 0 | 0.0%  | 0.0%  | General Surgery | 3.53  | 4.94  |
| 44144 | Partial removal of colon     | 133   | 9 | 8.0%  | 13.7% | General Surgery | 29.91 | 31.28 |
| 19110 | Nipple exploration           | 32    | 0 | 0.6%  | 1.7%  | General Surgery | 4.44  | 5.80  |
| 43284 | Laps esophgl sphnctr agmntj  | 70    | 0 | 0.0%  | 2.5%  | General Surgery | 10.13 | 11.44 |
| 44960 | Appendectomy                 | 65    | 4 | 2.6%  | 7.9%  | General Surgery | 14.50 | 15.81 |
| 19305 | Mast radical                 | 115   | 1 | 3.6%  | 4.4%  | General Surgery | 17.46 | 18.73 |
| 44211 | Lap colectomy w/proctectomy  | 273.5 | 5 | 6.9%  | 20.0% | General Surgery | 37.08 | 38.28 |
| 44950 | Appendectomy                 | 54    | 2 | 2.2%  | 5.9%  | General Surgery | 10.60 | 11.73 |

|       |                              |       |   |       |       |                 |       |       |
|-------|------------------------------|-------|---|-------|-------|-----------------|-------|-------|
| 44130 | Bowel to bowel fusion        | 96.5  | 7 | 7.6%  | 15.5% | General Surgery | 22.11 | 23.20 |
| 44050 | Reduce bowel obstruction     | 62    | 5 | 4.6%  | 9.2%  | General Surgery | 15.52 | 16.60 |
| 60271 | Removal of thyroid           | 117   | 1 | 0.9%  | 2.2%  | General Surgery | 17.62 | 18.69 |
| 44155 | Removal of colon/ileostomy   | 207   | 7 | 10.1% | 15.5% | General Surgery | 34.42 | 35.45 |
| 44620 | Repair bowel opening         | 71    | 3 | 4.1%  | 9.2%  | General Surgery | 14.43 | 15.34 |
| 44210 | Laparo total proctocolectomy | 195   | 4 | 6.4%  | 14.7% | General Surgery | 30.09 | 30.97 |
| 36475 | Endovenous rf 1st vein       | 36    | 0 | 0.7%  | 0.7%  | General Surgery | 5.30  | 6.18  |
| 15830 | Exc skin abd                 | 108.5 | 1 | 5.0%  | 6.6%  | General Surgery | 17.11 | 17.99 |
| 27590 | Amputate leg at thigh        | 52    | 5 | 7.8%  | 14.0% | General Surgery | 13.47 | 14.32 |
| 45119 | Remove rectum w/reservoir    | 222   | 5 | 3.8%  | 19.3% | General Surgery | 33.48 | 34.28 |
| 44140 | Partial removal of colon     | 114   | 5 | 6.3%  | 10.4% | General Surgery | 22.59 | 23.37 |
| 49505 | Prp i/hern init reduc >5 yr  | 52    | 0 | 0.6%  | 1.6%  | General Surgery | 7.96  | 8.73  |
| 26990 | Drainage of pelvis lesion    | 22    | 4 | 8.4%  | 9.3%  | General Surgery | 7.95  | 8.72  |
| 19020 | Incision of breast lesion    | 16    | 1 | 3.7%  | 3.3%  | General Surgery | 3.83  | 4.59  |
| 43820 | Fusion of stomach and bowel  | 98    | 7 | 5.9%  | 17.5% | General Surgery | 22.53 | 23.28 |
| 44310 | Ileostomy/jejunostomy        | 76    | 7 | 7.2%  | 23.3% | General Surgery | 17.59 | 18.29 |
| 37700 | Revise leg vein              | 26    | 0 | 0.0%  | 0.0%  | General Surgery | 3.82  | 4.48  |
| 27327 | Exc thigh/knee les sc < 3 cm | 24    | 0 | 0.0%  | 1.8%  | General Surgery | 3.96  | 4.56  |
| 27301 | Drain thigh/knee lesion      | 18    | 3 | 5.9%  | 8.3%  | General Surgery | 6.78  | 7.32  |
| 45112 | Removal of rectum            | 205   | 5 | 6.7%  | 7.6%  | General Surgery | 33.18 | 33.71 |
| 37765 | Stab phleb veins xtr 10-20   | 51    | 0 | 0.0%  | 0.0%  | General Surgery | 7.71  | 8.21  |
| 49654 | Lap inc hernia repair        | 81    | 1 | 1.1%  | 4.0%  | General Surgery | 13.76 | 14.24 |
| 27880 | Amputation of lower leg      | 63    | 5 | 7.5%  | 14.9% | General Surgery | 15.37 | 15.83 |
| 60225 | Partial removal of thyroid   | 92    | 1 | 1.1%  | 1.1%  | General Surgery | 14.79 | 15.22 |
| 44005 | Freeing of bowel adhesion    | 68    | 6 | 4.5%  | 11.4% | General Surgery | 18.46 | 18.78 |
| 44208 | L colectomy/coloproctostomy  | 222   | 5 | 7.4%  | 17.6% | General Surgery | 33.99 | 34.26 |
| 24075 | Exc arm/elbow les sc < 3 cm  | 24    | 0 | 0.5%  | 1.0%  | General Surgery | 4.24  | 4.42  |
| 49565 | Rerepair ventrl hern reduce  | 67    | 1 | 2.7%  | 6.4%  | General Surgery | 12.37 | 12.53 |
| 44120 | Removal of small intestine   | 86    | 6 | 7.0%  | 10.3% | General Surgery | 20.82 | 20.97 |
| 45397 | Lap remove rectum w/pouch    | 261   | 4 | 6.7%  | 17.4% | General Surgery | 36.50 | 36.64 |
| 49590 | Repair spigelian hernia      | 52    | 0 | 0.7%  | 3.0%  | General Surgery | 8.90  | 8.99  |
| 49521 | Rerepair ing hernia blocked  | 68    | 0 | 2.0%  | 4.9%  | General Surgery | 11.48 | 11.56 |
| 49324 | Lap insert tunnel ip cath    | 33    | 0 | 5.5%  | 10.9% | General Surgery | 6.32  | 6.39  |
| 37607 | Ligation of a-v fistula      | 32    | 0 | 3.9%  | 12.6% | General Surgery | 6.25  | 6.27  |
| 44340 | Revision of colostomy        | 45.5  | 1 | 4.0%  | 12.8% | General Surgery | 9.28  | 9.25  |
| 47563 | Laparo cholecystectomy/graph | 61    | 1 | 1.1%  | 3.7%  | General Surgery | 11.47 | 11.40 |
| 37722 | Ligate/strip long leg vein   | 47.5  | 0 | 0.0%  | 1.6%  | General Surgery | 8.16  | 8.04  |
| 44143 | Partial removal of colon     | 115   | 8 | 8.0%  | 10.5% | General Surgery | 27.79 | 27.64 |
| 44150 | Removal of colon             | 147.5 | 8 | 11.5% | 15.8% | General Surgery | 30.18 | 30.01 |
| 32666 | Thoracoscopy w/wedge resect  | 63.5  | 3 | 2.5%  | 6.8%  | General Surgery | 14.50 | 14.30 |

|       |                              |       |   |      |       |                 |       |       |
|-------|------------------------------|-------|---|------|-------|-----------------|-------|-------|
| 43633 | Removal of stomach partial   | 176   | 7 | 8.9% | 12.4% | General Surgery | 33.14 | 32.94 |
| 49553 | Rpr fem hernia init blocked  | 48    | 1 | 2.8% | 5.0%  | General Surgery | 9.92  | 9.68  |
| 49656 | Lap inc hernia repair recur  | 86    | 1 | 1.4% | 3.4%  | General Surgery | 15.08 | 14.83 |
| 32651 | Thoracoscopy remove cortex   | 69    | 6 | 7.6% | 7.6%  | General Surgery | 18.78 | 18.53 |
| 46947 | Hemorrhoidopexy by stapling  | 28    | 0 | 1.6% | 2.2%  | General Surgery | 5.57  | 5.32  |
| 32663 | Thoracoscopy w/lobectomy     | 132.5 | 4 | 0.8% | 3.9%  | General Surgery | 24.64 | 24.36 |
| 44626 | Repair bowel opening         | 147   | 5 | 4.8% | 7.8%  | General Surgery | 27.90 | 27.62 |
| 45402 | Lap proctopexy w/sig resect  | 160   | 3 | 4.4% | 3.5%  | General Surgery | 26.51 | 26.22 |
| 44205 | Lap colectomy part w/ileum   | 126   | 3 | 3.1% | 7.8%  | General Surgery | 22.95 | 22.64 |
| 43631 | Removal of stomach partial   | 118.5 | 5 | 4.6% | 8.8%  | General Surgery | 24.51 | 24.18 |
| 27047 | Exc hip/pelvis les sc < 3 cm | 26.5  | 0 | 1.0% | 0.0%  | General Surgery | 4.94  | 4.60  |
| 60200 | Remove thyroid lesion        | 57    | 0 | 0.0% | 2.7%  | General Surgery | 10.02 | 9.63  |
| 19125 | Excision breast lesion       | 35    | 0 | 0.8% | 1.4%  | General Surgery | 6.69  | 6.20  |
| 60254 | Extensive thyroid surgery    | 194   | 1 | 3.9% | 4.5%  | General Surgery | 28.42 | 27.87 |
| 19303 | Mast simple complete         | 89    | 1 | 3.4% | 3.9%  | General Surgery | 15.85 | 15.28 |
| 45541 | Correct rectal prolapse      | 73    | 2 | 5.8% | 10.7% | General Surgery | 14.85 | 14.23 |
| 49520 | Rerepair ing hernia reduce   | 56    | 0 | 0.6% | 1.7%  | General Surgery | 9.99  | 9.34  |
| 49570 | Rpr epigastric hern reduce   | 30    | 0 | 0.5% | 1.1%  | General Surgery | 6.05  | 5.36  |
| 44314 | Revision of ileostomy        | 77    | 3 | 4.6% | 11.7% | General Surgery | 16.74 | 16.02 |
| 44346 | Revision of colostomy        | 97    | 4 | 7.4% | 16.4% | General Surgery | 19.63 | 18.90 |
| 49587 | Rpr umbil hern block > 5 yr  | 35    | 0 | 0.9% | 2.1%  | General Surgery | 7.08  | 6.34  |
| 43611 | Excision of stomach lesion   | 97    | 4 | 0.0% | 2.7%  | General Surgery | 20.38 | 19.62 |
| 46040 | Incision of rectal abscess   | 15    | 1 | 5.0% | 5.2%  | General Surgery | 5.37  | 4.56  |
| 49585 | Rpr umbil hern reduc > 5 yr  | 32    | 0 | 0.5% | 1.3%  | General Surgery | 6.59  | 5.72  |
| 49652 | Lap vent/abd hernia repair   | 66    | 0 | 0.9% | 2.6%  | General Surgery | 11.92 | 10.95 |
| 19120 | Removal of breast lesion     | 27    | 0 | 0.7% | 1.2%  | General Surgery | 5.92  | 4.94  |
| 44970 | Laparoscopy appendectomy     | 41    | 1 | 0.9% | 3.3%  | General Surgery | 9.45  | 8.43  |
| 46045 | Incision of rectal abscess   | 17    | 1 | 6.2% | 5.8%  | General Surgery | 5.87  | 4.77  |
| 47562 | Laparoscopic cholecystectomy | 53    | 0 | 0.9% | 3.7%  | General Surgery | 10.47 | 9.26  |
| 44145 | Partial removal of colon     | 145   | 5 | 5.5% | 9.6%  | General Surgery | 28.58 | 27.31 |
| 38760 | Remove groin lymph nodes     | 65.5  | 1 | 3.8% | 10.2% | General Surgery | 13.62 | 12.33 |
| 19307 | Mast mod rad                 | 101   | 1 | 3.1% | 4.0%  | General Surgery | 18.23 | 16.90 |
| 45550 | Repair rectum/remove sigmoid | 122   | 4 | 2.2% | 6.5%  | General Surgery | 24.80 | 23.35 |
| 38740 | Remove armpit lymph nodes    | 51    | 0 | 4.0% | 7.4%  | General Surgery | 10.70 | 9.23  |
| 49422 | Remove tunneled ip cath      | 23    | 0 | 4.4% | 13.1% | General Surgery | 6.29  | 4.81  |
| 43107 | Removal of esophagus         | 260   | 8 | 9.4% | 10.7% | General Surgery | 44.18 | 42.69 |
| 49566 | Rerepair ventrl hern block   | 70    | 2 | 4.3% | 8.2%  | General Surgery | 15.53 | 14.02 |
| 49550 | Rpr rem hernia init reduce   | 42    | 0 | 1.3% | 2.0%  | General Surgery | 8.99  | 7.38  |
| 47564 | Laparo cholecystectomy/explr | 94.5  | 1 | 2.4% | 6.9%  | General Surgery | 18.00 | 16.34 |
| 44625 | Repair bowel opening         | 72    | 3 | 3.9% | 9.5%  | General Surgery | 17.28 | 15.49 |



|       |                              |       |   |       |       |                 |       |       |
|-------|------------------------------|-------|---|-------|-------|-----------------|-------|-------|
| 43280 | Laparoscopy fundoplasty      | 96    | 1 | 2.0%  | 4.2%  | General Surgery | 18.10 | 16.29 |
| 46060 | Incision of rectal abscess   | 21    | 0 | 3.1%  | 4.5%  | General Surgery | 6.37  | 4.57  |
| 43860 | Revise stomach-bowel fusion  | 144   | 4 | 5.6%  | 9.9%  | General Surgery | 27.89 | 25.84 |
| 60650 | Laparoscopy adrenalectomy    | 113.5 | 1 | 0.6%  | 4.2%  | General Surgery | 20.73 | 18.55 |
| 43279 | Lap myotomy heller           | 125   | 1 | 1.1%  | 3.4%  | General Surgery | 22.10 | 19.90 |
| 19302 | P-mastectomy w/lr removal    | 71    | 0 | 2.0%  | 3.2%  | General Surgery | 13.99 | 11.76 |
| 38724 | Removal of lymph nodes neck  | 140   | 1 | 3.5%  | 3.5%  | General Surgery | 23.95 | 21.71 |
| 49325 | Lap revision perm ip cath    | 31    | 0 | 11.6% | 11.9% | General Surgery | 6.82  | 4.56  |
| 49655 | Lap inc hern repair comp     | 83    | 1 | 1.2%  | 3.8%  | General Surgery | 16.84 | 14.49 |
| 45113 | Partial proctectomy          | 204   | 5 | 3.6%  | 23.8% | General Surgery | 33.22 | 30.95 |
| 44204 | Laparo partial colectomy     | 138   | 3 | 3.2%  | 6.7%  | General Surgery | 26.42 | 24.05 |
| 43846 | Gastric bypass for obesity   | 154   | 2 | 1.4%  | 8.8%  | General Surgery | 27.41 | 24.87 |
| 44141 | Partial removal of colon     | 114   | 8 | 8.9%  | 10.0% | General Surgery | 29.91 | 27.32 |
| 49572 | Rpr epigastric hern blocked  | 29    | 0 | 0.8%  | 1.0%  | General Surgery | 7.87  | 5.21  |
| 60252 | Removal of thyroid           | 120   | 1 | 1.1%  | 3.5%  | General Surgery | 22.01 | 19.28 |
| 19301 | Partial mastectomy           | 41    | 0 | 1.2%  | 1.7%  | General Surgery | 10.13 | 7.17  |
| 43632 | Removal of stomach partial   | 161   | 7 | 5.3%  | 11.5% | General Surgery | 35.14 | 32.02 |
| 60500 | Explore parathyroid glands   | 76    | 0 | 1.0%  | 2.7%  | General Surgery | 15.60 | 12.36 |
| 43840 | Repair of stomach lesion     | 64    | 7 | 6.1%  | 9.7%  | General Surgery | 22.83 | 19.59 |
| 44227 | Lap close enterostomy        | 149   | 3 | 3.7%  | 7.0%  | General Surgery | 28.62 | 25.35 |
| 44188 | Lap colostomy                | 69    | 4 | 4.7%  | 13.3% | General Surgery | 19.35 | 16.00 |
| 44146 | Partial removal of colon     | 161.5 | 7 | 5.8%  | 12.7% | General Surgery | 35.30 | 31.89 |
| 49560 | Rpr ventral hern init reduc  | 48    | 0 | 1.6%  | 3.3%  | General Surgery | 11.92 | 8.49  |
| 44202 | Lap enterectomy              | 95    | 4 | 3.5%  | 7.6%  | General Surgery | 23.39 | 19.88 |
| 35301 | Rechanneling of artery       | 103   | 1 | 3.1%  | 6.3%  | General Surgery | 21.16 | 17.40 |
| 44602 | Suture small intestine       | 74    | 7 | 5.5%  | 6.0%  | General Surgery | 24.72 | 20.97 |
| 44345 | Revision of colostomy        | 59    | 3 | 3.3%  | 13.1% | General Surgery | 17.22 | 13.46 |
| 49653 | Lap vent/abd hern proc comp  | 67    | 0 | 0.9%  | 2.5%  | General Surgery | 14.94 | 11.06 |
| 44206 | Lap part colectomy w/stoma   | 134   | 5 | 5.7%  | 11.5% | General Surgery | 29.79 | 25.88 |
| 44180 | Lap enterolysis              | 51    | 2 | 3.8%  | 7.5%  | General Surgery | 15.27 | 11.33 |
| 60260 | Repeat thyroid surgery       | 83    | 1 | 0.9%  | 2.0%  | General Surgery | 18.26 | 14.19 |
| 44187 | Lap ileo/jejuno-stomy        | 63    | 4 | 6.4%  | 20.5% | General Surgery | 17.40 | 13.37 |
| 45020 | Drainage of rectal abscess   | 19    | 1 | 9.5%  | 7.8%  | General Surgery | 8.56  | 4.49  |
| 48150 | Partial removal of pancreas  | 344   | 8 | 5.3%  | 16.6% | General Surgery | 52.84 | 48.89 |
| 45130 | Excision of rectal prolapse  | 72    | 2 | 3.4%  | 8.2%  | General Surgery | 18.50 | 14.36 |
| 44158 | Colectomy w/neo-rectum pouch | 205.5 | 6 | 4.8%  | 23.5% | General Surgery | 36.70 | 32.56 |
| 49203 | Exc abd tum 5 cm or less     | 84.5  | 2 | 1.4%  | 3.6%  | General Surgery | 20.13 | 15.74 |
| 45123 | Partial proctectomy          | 73    | 2 | 5.4%  | 9.6%  | General Surgery | 18.86 | 14.32 |
| 52601 | Prostatectomy (turp)         | 57    | 1 | 1.0%  | 2.9%  | General Surgery | 15.26 | 10.71 |
| 11005 | Debride abdom wall           | 29    | 4 | 8.7%  | 9.1%  | General Surgery | 14.24 | 9.72  |

|       |                              |       |   |       |       |                 |       |       |
|-------|------------------------------|-------|---|-------|-------|-----------------|-------|-------|
| 27447 | Total knee arthroplasty      | 90    | 2 | 0.4%  | 1.9%  | General Surgery | 20.72 | 16.17 |
| 14301 | Tis trnfr any 30.1-60 sq cm  | 47    | 0 | 1.2%  | 1.2%  | General Surgery | 12.65 | 7.95  |
| 44320 | Colostomy                    | 60    | 5 | 6.2%  | 17.0% | General Surgery | 19.91 | 15.22 |
| 44207 | L colectomy/coloproctostomy  | 165   | 3 | 3.5%  | 6.4%  | General Surgery | 31.92 | 27.16 |
| 28805 | Amputation thru metatarsal   | 39    | 5 | 17.2% | 18.0% | General Surgery | 12.71 | 8.07  |
| 48153 | Pancreatectomy               | 321   | 8 | 4.7%  | 14.7% | General Surgery | 52.79 | 47.81 |
| 49205 | Exc abd tum over 10 cm       | 135   | 4 | 3.3%  | 4.4%  | General Surgery | 30.13 | 24.71 |
| 49204 | Exc abd tum over 5 cm        | 108   | 3 | 4.1%  | 8.3%  | General Surgery | 26.13 | 20.31 |
| 49561 | Rpr ventral hern init block  | 47    | 1 | 1.8%  | 4.8%  | General Surgery | 15.38 | 9.53  |
| 43772 | Lap rmvl gastr adj device    | 58    | 0 | 0.5%  | 2.1%  | General Surgery | 15.70 | 9.69  |
| 49657 | Lap inc hern recur comp      | 93    | 1 | 1.7%  | 4.9%  | General Surgery | 22.11 | 15.98 |
| 60502 | Re-explore parathyroids      | 84    | 1 | 0.4%  | 2.2%  | General Surgery | 21.15 | 14.33 |
| 43845 | Gastroplasty duodenal switch | 170.5 | 2 | 5.7%  | 7.9%  | General Surgery | 33.30 | 26.47 |
| 47370 | Laparo ablate liver tumor rf | 79    | 1 | 1.4%  | 3.4%  | General Surgery | 20.80 | 13.88 |
| 43775 | Lap sleeve gastrectomy       | 68    | 2 | 0.9%  | 2.7%  | General Surgery | 20.38 | 13.31 |
| 43645 | Lap gastr bypass incl smll i | 150   | 2 | 4.1%  | 7.7%  | General Surgery | 31.53 | 24.30 |
| 43774 | Lap rmvl gastr adj all parts | 48    | 0 | 1.4%  | 1.8%  | General Surgery | 15.76 | 8.21  |
| 43282 | Lap paraesoph her rpr w/mesh | 134   | 2 | 2.3%  | 5.9%  | General Surgery | 30.10 | 22.37 |
| 44157 | Colectomy w/ileoanal anast   | 146   | 6 | 10.1% | 9.2%  | General Surgery | 35.70 | 27.88 |
| 43281 | Lap paraesophag hern repair  | 110   | 1 | 2.2%  | 4.6%  | General Surgery | 26.60 | 18.17 |
| 43644 | Lap gastric bypass/roux-en-y | 120   | 2 | 2.0%  | 4.9%  | General Surgery | 29.40 | 20.55 |
| 43770 | Lap place gastr adj device   | 54    | 0 | 1.5%  | 1.8%  | General Surgery | 18.00 | 9.10  |
| 43848 | Revision gastroplasty        | 134   | 3 | 4.7%  | 11.6% | General Surgery | 32.75 | 23.42 |
| 47120 | Partial removal of liver     | 160   | 4 | 1.6%  | 7.4%  | General Surgery | 39.01 | 27.94 |
| 49020 | Drainage abdom abscess open  | 47    | 6 | 9.7%  | 12.4% | General Surgery | 26.67 | 14.71 |
| 47130 | Partial removal of liver     | 242   | 6 | 4.9%  | 11.2% | General Surgery | 57.19 | 38.86 |
| 47122 | Extensive removal of liver   | 257   | 6 | 4.6%  | 13.3% | General Surgery | 59.48 | 40.02 |
| 47125 | Partial removal of liver     | 198   | 5 | 1.8%  | 7.4%  | General Surgery | 53.04 | 33.39 |
| 57282 | Colpopexy extraperitoneal    | 93    | 1 | 1.3%  | 2.5%  | Gynecology      | 7.97  | 15.64 |
| 58544 | Lsh w/t/o uterus above 250 g | 146   | 1 | 0.5%  | 2.1%  | Gynecology      | 15.60 | 22.21 |
| 58541 | Lsh uterus 250 g or less     | 110   | 1 | 1.2%  | 0.8%  | Gynecology      | 12.29 | 17.52 |
| 58546 | Laparo-myomectomy complex    | 178.5 | 0 | 0.7%  | 1.4%  | Gynecology      | 19.94 | 24.77 |
| 58545 | Laparoscopic myomectomy      | 140   | 0 | 0.4%  | 1.5%  | Gynecology      | 15.55 | 20.38 |
| 58940 | Removal of ovary(s)          | 65    | 2 | 1.5%  | 3.0%  | Gynecology      | 8.22  | 12.95 |
| 57425 | Laparoscopy surg colpopexy   | 141   | 1 | 2.4%  | 2.4%  | Gynecology      | 17.03 | 21.69 |
| 58570 | Tlh uterus 250 g or less     | 109   | 1 | 1.5%  | 2.6%  | Gynecology      | 13.36 | 17.76 |
| 57120 | Closure of vagina            | 70.5  | 1 | 2.2%  | 2.2%  | Gynecology      | 8.28  | 12.52 |
| 58542 | Lsh w/t/o ut 250 g or less   | 113.5 | 1 | 0.8%  | 2.2%  | Gynecology      | 14.16 | 18.25 |
| 56405 | I & d of vulva/perineum      | 18    | 1 | 3.8%  | 5.4%  | Gynecology      | 1.49  | 5.15  |
| 58951 | Resect ovarian malignancy    | 167   | 3 | 0.8%  | 8.0%  | Gynecology      | 24.26 | 27.49 |

|       |                              |      |   |      |       |            |       |       |
|-------|------------------------------|------|---|------|-------|------------|-------|-------|
| 49321 | Laparoscopy biopsy           | 45   | 0 | 1.2% | 4.0%  | Gynecology | 5.44  | 8.13  |
| 58572 | Tlh uterus over 250 g        | 130  | 1 | 1.7% | 2.3%  | Gynecology | 17.71 | 20.34 |
| 58571 | Tlh w/t/o 250 g or less      | 107  | 1 | 1.1% | 2.7%  | Gynecology | 15.00 | 17.51 |
| 49000 | Exploration of abdomen       | 76.5 | 2 | 1.9% | 8.1%  | Gynecology | 12.54 | 15.03 |
| 58950 | Resect ovarian malignancy    | 110  | 3 | 1.9% | 5.7%  | Gynecology | 18.37 | 20.52 |
| 56740 | Remove vagina gland lesion   | 40   | 0 | 3.0% | 1.4%  | Gynecology | 4.88  | 6.93  |
| 58720 | Removal of ovary/tube(s)     | 73   | 2 | 1.6% | 3.1%  | Gynecology | 12.16 | 14.09 |
| 49322 | Laparoscopy aspiration       | 45   | 0 | 1.8% | 2.0%  | Gynecology | 6.01  | 7.82  |
| 58140 | Myomectomy abdom method      | 100  | 2 | 0.3% | 1.0%  | Gynecology | 15.79 | 17.30 |
| 58200 | Extensive hysterectomy       | 143  | 3 | 0.5% | 5.7%  | Gynecology | 23.10 | 24.58 |
| 58550 | Laparo-asst vag hysterectomy | 100  | 1 | 1.9% | 2.5%  | Gynecology | 15.10 | 16.56 |
| 58150 | Total hysterectomy           | 106  | 2 | 2.0% | 4.1%  | Gynecology | 17.31 | 18.67 |
| 56810 | Repair of perineum           | 30.5 | 0 | 2.6% | 1.7%  | Gynecology | 4.29  | 5.59  |
| 58943 | Removal of ovary(s)          | 111  | 3 | 1.6% | 6.3%  | Gynecology | 19.52 | 20.69 |
| 57135 | Remove vagina lesion         | 21   | 0 | 0.0% | 0.3%  | Gynecology | 2.70  | 3.80  |
| 58180 | Partial hysterectomy         | 98   | 2 | 1.4% | 2.4%  | Gynecology | 16.60 | 17.36 |
| 56440 | Surgery for vulva lesion     | 19   | 0 | 1.1% | 0.7%  | Gynecology | 2.89  | 3.62  |
| 58573 | Tlh w/t/o uterus over 250 g  | 138  | 1 | 1.2% | 2.6%  | Gynecology | 20.79 | 21.36 |
| 58146 | Myomectomy abdom complex     | 126  | 2 | 0.7% | 2.3%  | Gynecology | 20.34 | 20.90 |
| 58925 | Removal of ovarian cyst(s)   | 73   | 1 | 0.2% | 1.8%  | Gynecology | 12.43 | 12.74 |
| 57267 | Insert mesh/pelvic flr addon | 26.5 | 0 | 0.0% | 2.9%  | Gynecology | 4.88  | 5.14  |
| 58552 | Laparo-vag hyst incl t/o     | 103  | 1 | 1.2% | 2.5%  | Gynecology | 16.91 | 16.95 |
| 58956 | Bso omentectomy w/tah        | 129  | 3 | 0.9% | 4.7%  | Gynecology | 22.80 | 22.79 |
| 58553 | Laparo-vag hyst complex      | 127  | 1 | 1.8% | 2.4%  | Gynecology | 20.06 | 19.99 |
| 57200 | Repair of vagina             | 22   | 0 | 0.9% | 1.9%  | Gynecology | 4.42  | 4.31  |
| 58263 | Vag hyst w/t/o & vag repair  | 101  | 1 | 2.2% | 3.1%  | Gynecology | 17.23 | 16.80 |
| 58600 | Division of fallopian tube   | 30   | 0 | 0.0% | 0.9%  | Gynecology | 5.91  | 5.29  |
| 58353 | Endometr ablate thermal      | 13   | 0 | 0.0% | 0.7%  | Gynecology | 3.60  | 2.63  |
| 58260 | Vaginal hysterectomy         | 73.5 | 1 | 1.6% | 3.2%  | Gynecology | 14.15 | 13.09 |
| 58670 | Laparoscopy tubal cautery    | 27   | 0 | 0.3% | 0.7%  | Gynecology | 5.91  | 4.81  |
| 58952 | Resect ovarian malignancy    | 144  | 4 | 2.9% | 11.1% | Gynecology | 27.29 | 26.02 |
| 58270 | Vag hyst w/enterocele repair | 78.5 | 1 | 1.8% | 2.4%  | Gynecology | 15.30 | 13.65 |
| 59120 | Treat ectopic pregnancy      | 52   | 2 | 1.6% | 2.1%  | Gynecology | 12.67 | 10.93 |
| 57295 | Revise vag graft via vagina  | 34   | 0 | 0.0% | 1.8%  | Gynecology | 7.82  | 6.08  |
| 58671 | Laparoscopy tubal block      | 23   | 0 | 0.2% | 0.2%  | Gynecology | 5.91  | 4.08  |
| 58554 | Laparo-vag hyst w/t/o compl  | 135  | 1 | 1.1% | 2.7%  | Gynecology | 23.11 | 21.01 |
| 56620 | Partial removal of vulva     | 30   | 0 | 1.0% | 1.3%  | Gynecology | 7.53  | 5.43  |
| 58262 | Vag hyst including t/o       | 79   | 1 | 1.4% | 2.6%  | Gynecology | 15.94 | 13.76 |
| 58290 | Vag hyst complex             | 109  | 1 | 1.6% | 4.7%  | Gynecology | 20.27 | 18.06 |
| 57260 | Repair of vagina             | 69   | 1 | 1.0% | 1.2%  | Gynecology | 14.44 | 12.10 |

|       |                              |       |    |       |       |              |       |       |
|-------|------------------------------|-------|----|-------|-------|--------------|-------|-------|
| 58662 | Laparoscopy excise lesions   | 58    | 0  | 0.7%  | 0.9%  | Gynecology   | 12.15 | 9.47  |
| 58145 | Myomectomy vag method        | 32    | 0  | 1.4%  | 1.9%  | Gynecology   | 8.91  | 5.86  |
| 59150 | Treat ectopic pregnancy      | 54    | 0  | 2.0%  | 2.4%  | Gynecology   | 12.29 | 9.20  |
| 57250 | Repair rectum & vagina       | 46    | 0  | 1.7%  | 2.3%  | Gynecology   | 11.50 | 8.02  |
| 58661 | Laparoscopy remove adnexa    | 47    | 0  | 0.4%  | 0.8%  | Gynecology   | 11.35 | 7.84  |
| 59151 | Treat ectopic pregnancy      | 51    | 0  | 0.6%  | 0.6%  | Gynecology   | 12.11 | 8.39  |
| 58210 | Extensive hysterectomy       | 162   | 3  | 1.8%  | 6.0%  | Gynecology   | 30.91 | 26.84 |
| 57240 | Repair bladder & vagina      | 38    | 1  | 0.2%  | 0.5%  | Gynecology   | 11.50 | 7.41  |
| 58660 | Laparoscopy lysis            | 43    | 0  | 0.6%  | 0.6%  | Gynecology   | 11.59 | 7.22  |
| 58291 | Vag hyst incl t/o complex    | 104   | 1  | 2.6%  | 3.1%  | Gynecology   | 22.06 | 17.17 |
| 57265 | Extensive repair of vagina   | 55    | 1  | 0.8%  | 1.9%  | Gynecology   | 15.94 | 10.23 |
| 58700 | Removal of fallopian tube    | 39    | 0  | 0.7%  | 1.4%  | Gynecology   | 12.95 | 6.79  |
| 44180 | Lap enterolysis              | 47    | 0  | 1.9%  | 5.0%  | Gynecology   | 15.27 | 8.55  |
| 57288 | Repair bladder defect        | 28    | 0  | 0.8%  | 0.7%  | Gynecology   | 12.13 | 4.98  |
| 58953 | Tah rad dissect for debulk   | 152   | 4  | 2.0%  | 5.9%  | Gynecology   | 34.13 | 26.92 |
| 58954 | Tah rad debulk/lymph remove  | 176   | 4  | 2.4%  | 10.6% | Gynecology   | 37.13 | 29.71 |
| 58548 | Lap radical hyst             | 159   | 1  | 1.4%  | 5.1%  | Gynecology   | 31.63 | 24.18 |
| 22600 | Neck spine fusion            | 158   | 3  | 5.8%  | 4.3%  | Neurosurgery | 17.40 | 25.94 |
| 22630 | Lumbar spine fusion          | 195   | 3  | 3.7%  | 4.2%  | Neurosurgery | 22.09 | 30.18 |
| 22612 | Lumbar spine fusion          | 199.5 | 3  | 4.0%  | 7.0%  | Neurosurgery | 23.53 | 30.87 |
| 22633 | Lumbar spine fusion combined | 204.5 | 3  | 3.1%  | 7.2%  | Neurosurgery | 27.75 | 31.45 |
| 63017 | Remove spine lamina >2 lmb   | 125   | 2  | 3.6%  | 3.8%  | Neurosurgery | 17.33 | 21.00 |
| 63003 | Remove spine lamina 1/2 thr  | 117   | 3  | 5.1%  | 12.8% | Neurosurgery | 17.74 | 21.16 |
| 22852 | Remove spine fixation device | 66.5  | 1  | 1.6%  | 7.4%  | Neurosurgery | 9.37  | 12.53 |
| 63282 | Bx/exc idrl spine lesn lmb   | 191   | 4  | 6.1%  | 5.3%  | Neurosurgery | 28.15 | 30.88 |
| 22558 | Lumbar spine fusion          | 162   | 2  | 2.7%  | 5.7%  | Neurosurgery | 23.53 | 25.64 |
| 63005 | Remove spine lamina 1/2 lmb  | 102   | 2  | 2.5%  | 4.9%  | Neurosurgery | 16.43 | 18.24 |
| 63271 | Excise intrspin lesion thr   | 181   | 5  | 1.9%  | 6.7%  | Neurosurgery | 29.92 | 31.56 |
| 22554 | Neck spine fusion            | 117   | 1  | 0.9%  | 4.2%  | Neurosurgery | 17.69 | 19.00 |
| 63266 | Excise intrspin lesion thr   | 110.5 | 7  | 5.7%  | 4.9%  | Neurosurgery | 24.68 | 25.71 |
| 35301 | Rechanneling of artery       | 131   | 2  | 2.9%  | 5.2%  | Neurosurgery | 21.16 | 21.93 |
| 61885 | Insrt/redo neurostim 1 array | 34    | 0  | 0.8%  | 3.1%  | Neurosurgery | 6.05  | 6.36  |
| 63281 | Bx/exc idrl spine lesn thr   | 181   | 4  | 5.7%  | 7.6%  | Neurosurgery | 29.99 | 30.01 |
| 63030 | Low back disk surgery        | 74.5  | 1  | 1.8%  | 2.8%  | Neurosurgery | 13.18 | 13.18 |
| 63046 | Remove spine lamina 1 thr    | 93.5  | 2  | 5.0%  | 8.1%  | Neurosurgery | 17.25 | 17.16 |
| 63001 | Remove spine lamina 1/2 crvl | 94    | 2  | 4.3%  | 9.1%  | Neurosurgery | 17.61 | 17.30 |
| 61500 | Removal of skull lesion      | 105   | 2  | 2.5%  | 6.6%  | Neurosurgery | 19.18 | 18.77 |
| 61313 | Open skull for drainage      | 105   | 10 | 13.5% | 3.0%  | Neurosurgery | 28.09 | 27.59 |
| 63051 | C-laminoplasty w/graft/plate | 143   | 3  | 1.8%  | 6.3%  | Neurosurgery | 25.51 | 24.65 |
| 61548 | Removal of pituitary gland   | 125   | 3  | 3.7%  | 6.6%  | Neurosurgery | 23.37 | 22.43 |

|       |                              |       |    |       |       |              |       |       |
|-------|------------------------------|-------|----|-------|-------|--------------|-------|-------|
| 63015 | Remove spine lamina >2 crvcl | 105   | 3  | 4.2%  | 6.8%  | Neurosurgery | 20.85 | 19.86 |
| 63047 | Remove spine lamina 1 lmr    | 79    | 1  | 2.1%  | 3.8%  | Neurosurgery | 15.37 | 13.95 |
| 61304 | Open skull for exploration   | 109   | 4  | 4.8%  | 9.5%  | Neurosurgery | 23.41 | 21.62 |
| 63276 | Bx/exc xdr spine lesn thr    | 117.5 | 5  | 4.7%  | 15.3% | Neurosurgery | 25.69 | 23.49 |
| 63075 | Neck spine disk surgery      | 106   | 1  | 3.2%  | 1.6%  | Neurosurgery | 19.60 | 17.15 |
| 63020 | Neck spine disk surgery      | 78    | 1  | 0.8%  | 1.9%  | Neurosurgery | 16.20 | 13.49 |
| 63045 | Remove spine lamina 1 crvl   | 85    | 1  | 2.2%  | 4.9%  | Neurosurgery | 17.95 | 14.90 |
| 61886 | Implant neurostim arrays     | 37    | 0  | 0.3%  | 1.7%  | Neurosurgery | 9.93  | 6.53  |
| 61458 | Incise skull for brain wound | 148.5 | 3  | 4.3%  | 8.0%  | Neurosurgery | 28.84 | 25.27 |
| 61510 | Removal of brain lesion      | 162   | 3  | 4.0%  | 11.0% | Neurosurgery | 30.83 | 26.82 |
| 61322 | Decompressive craniotomy     | 116   | 13 | 20.6% | 2.5%  | Neurosurgery | 34.26 | 30.82 |
| 61343 | Incise skull (press relief)  | 174   | 3  | 7.0%  | 12.8% | Neurosurgery | 31.86 | 27.62 |
| 63042 | Laminotomy single lumbar     | 81    | 1  | 2.9%  | 4.1%  | Neurosurgery | 18.76 | 14.25 |
| 63267 | Excise intrspinl lesion lmr  | 82.5  | 1  | 3.3%  | 5.6%  | Neurosurgery | 19.45 | 14.60 |
| 22551 | Neck spine fuse&remov bel c2 | 119   | 1  | 1.4%  | 3.3%  | Neurosurgery | 25.00 | 19.14 |
| 61512 | Remove brain lining lesion   | 197.5 | 3  | 3.8%  | 7.7%  | Neurosurgery | 37.14 | 30.72 |
| 63056 | Decompress spinal cord lmr   | 83    | 1  | 1.9%  | 2.3%  | Neurosurgery | 21.86 | 14.25 |
| 63272 | Excise intrspinl lesion lmr  | 122   | 1  | 2.4%  | 5.4%  | Neurosurgery | 27.50 | 19.77 |
| 61519 | Remove brain lining lesion   | 235   | 4  | 8.4%  | 7.6%  | Neurosurgery | 43.43 | 34.92 |
| 22856 | Cerv artific diskectomy      | 93    | 1  | 0.9%  | 1.2%  | Neurosurgery | 24.05 | 15.38 |
| 61312 | Open skull for drainage      | 88    | 7  | 13.2% | 10.0% | Neurosurgery | 30.17 | 20.96 |
| 61518 | Removal of brain lesion      | 182   | 4  | 7.8%  | 14.2% | Neurosurgery | 39.89 | 29.41 |
| 22857 | Lumbar artif diskectomy      | 99    | 1  | 0.7%  | 1.5%  | Neurosurgery | 27.13 | 16.22 |
| 61521 | Removal of brain lesion      | 211   | 4  | 11.8% | 12.7% | Neurosurgery | 46.99 | 31.46 |
| 61520 | Removal of brain lesion      | 296.5 | 4  | 6.6%  | 10.2% | Neurosurgery | 57.09 | 40.44 |
| 61700 | Brain aneurysm repr simple   | 201   | 4  | 7.1%  | 5.9%  | Neurosurgery | 50.62 | 31.80 |
| 61697 | Brain aneurysm repr complx   | 253   | 9  | 9.8%  | 6.9%  | Neurosurgery | 63.40 | 43.64 |
| 24546 | Treat humerus fracture       | 171.5 | 1  | 1.9%  | 6.5%  | Orthopedics  | 14.91 | 25.70 |
| 24435 | Repair humerus with graft    | 163   | 1  | 2.5%  | 5.9%  | Orthopedics  | 14.99 | 24.70 |
| 24545 | Treat humerus fracture       | 137   | 1  | 2.6%  | 6.4%  | Orthopedics  | 13.15 | 21.69 |
| 27507 | Treatment of thigh fracture  | 119   | 4  | 1.7%  | 6.2%  | Orthopedics  | 14.48 | 22.95 |
| 22630 | Lumbar spine fusion          | 186   | 3  | 4.2%  | 7.1%  | Orthopedics  | 22.09 | 29.45 |
| 23552 | Treat clavicle dislocation   | 105   | 0  | 1.9%  | 1.0%  | Orthopedics  | 8.82  | 15.93 |
| 24515 | Treat humerus fracture       | 116   | 1  | 2.4%  | 4.8%  | Orthopedics  | 12.12 | 18.95 |
| 27488 | Removal of knee prosthesis   | 129   | 4  | 5.3%  | 10.9% | Orthopedics  | 17.60 | 24.04 |
| 27514 | Treatment of thigh fracture  | 104   | 4  | 2.1%  | 5.7%  | Orthopedics  | 14.60 | 20.99 |
| 11044 | Deb bone 20 sq cm/<          | 33    | 4  | 8.3%  | 10.5% | Orthopedics  | 4.10  | 10.38 |
| 27472 | Repair/graft of thigh        | 150.5 | 3  | 2.0%  | 2.0%  | Orthopedics  | 18.72 | 24.98 |
| 11042 | Deb subq tissue 20 sq cm/<   | 25    | 2  | 5.6%  | 7.6%  | Orthopedics  | 1.01  | 7.26  |
| 25575 | Treat fracture radius/ulna   | 115   | 1  | 1.0%  | 1.7%  | Orthopedics  | 12.29 | 18.35 |

|       |                              |       |   |       |       |             |       |       |
|-------|------------------------------|-------|---|-------|-------|-------------|-------|-------|
| 24430 | Repair of humerus            | 132   | 1 | 4.1%  | 6.8%  | Orthopedics | 15.25 | 21.03 |
| 27702 | Reconstruct ankle joint      | 129   | 1 | 0.7%  | 1.8%  | Orthopedics | 14.42 | 20.11 |
| 11043 | Deb musc/fascia 20 sq cm/<   | 29    | 3 | 9.5%  | 8.8%  | Orthopedics | 2.70  | 8.29  |
| 29826 | Shoulder arthroscopy/surgery | 52    | 0 | 0.2%  | 0.5%  | Orthopedics | 3.00  | 8.48  |
| 24665 | Treat radius fracture        | 86    | 0 | 1.1%  | 1.7%  | Orthopedics | 8.36  | 13.55 |
| 27427 | Reconstruction knee          | 97.5  | 0 | 1.0%  | 1.0%  | Orthopedics | 9.79  | 14.94 |
| 27511 | Treatment of thigh fracture  | 97    | 4 | 2.7%  | 8.7%  | Orthopedics | 15.11 | 20.20 |
| 23615 | Treat humerus fracture       | 101   | 1 | 2.6%  | 4.0%  | Orthopedics | 12.30 | 16.92 |
| 23550 | Treat clavicle dislocation   | 78    | 0 | 0.6%  | 0.6%  | Orthopedics | 7.59  | 12.20 |
| 22852 | Remove spine fixation device | 79.5  | 1 | 0.0%  | 1.8%  | Orthopedics | 9.37  | 13.61 |
| 27380 | Repair of kneecap tendon     | 71    | 0 | 2.8%  | 2.2%  | Orthopedics | 7.45  | 11.58 |
| 27440 | Revision of knee joint       | 74    | 3 | 0.5%  | 1.6%  | Orthopedics | 11.09 | 15.10 |
| 27758 | Treatment of tibia fracture  | 89    | 2 | 3.2%  | 5.4%  | Orthopedics | 12.54 | 16.55 |
| 22633 | Lumbar spine fusion combined | 208   | 3 | 2.5%  | 5.4%  | Orthopedics | 27.75 | 31.70 |
| 27886 | Amputation follow-up surgery | 67    | 3 | 7.5%  | 14.0% | Orthopedics | 10.02 | 13.96 |
| 27535 | Treat knee fracture          | 95    | 2 | 1.7%  | 4.0%  | Orthopedics | 13.41 | 17.22 |
| 27823 | Treatment of ankle fracture  | 102   | 1 | 1.5%  | 2.7%  | Orthopedics | 13.16 | 16.86 |
| 29871 | Knee arthroscopy/drainage    | 36    | 4 | 10.6% | 7.9%  | Orthopedics | 6.69  | 10.23 |
| 22612 | Lumbar spine fusion          | 163   | 3 | 3.3%  | 5.9%  | Orthopedics | 23.53 | 26.91 |
| 24685 | Treat ulnar fracture         | 70    | 0 | 3.1%  | 3.7%  | Orthopedics | 8.37  | 11.67 |
| 25574 | Treat fracture radius & ulna | 77    | 0 | 0.0%  | 0.8%  | Orthopedics | 8.80  | 12.09 |
| 23515 | Treat clavicle fracture      | 83    | 0 | 1.0%  | 0.9%  | Orthopedics | 9.69  | 12.96 |
| 25440 | Repair/graft wrist bone      | 92    | 0 | 0.0%  | 0.0%  | Orthopedics | 10.68 | 13.93 |
| 26735 | Treat finger fracture each   | 65    | 0 | 0.9%  | 1.8%  | Orthopedics | 7.42  | 10.66 |
| 27385 | Repair of thigh muscle       | 61    | 0 | 1.4%  | 2.1%  | Orthopedics | 6.93  | 10.15 |
| 27822 | Treatment of ankle fracture  | 83    | 1 | 1.7%  | 3.1%  | Orthopedics | 11.21 | 14.40 |
| 23630 | Treat humerus fracture       | 86    | 0 | 0.8%  | 2.3%  | Orthopedics | 10.57 | 13.66 |
| 26356 | Repair finger/hand tendon    | 80    | 0 | 3.5%  | 1.4%  | Orthopedics | 9.56  | 12.63 |
| 27470 | Repair of thigh              | 109   | 3 | 2.3%  | 3.9%  | Orthopedics | 17.14 | 20.18 |
| 24340 | Repair of biceps tendon      | 70    | 0 | 0.0%  | 0.8%  | Orthopedics | 8.08  | 11.11 |
| 24516 | Treat humerus fracture       | 78    | 2 | 2.5%  | 5.8%  | Orthopedics | 12.19 | 15.11 |
| 24586 | Treat elbow fracture         | 117.5 | 1 | 1.2%  | 1.2%  | Orthopedics | 15.78 | 18.57 |
| 25515 | Treat fracture of radius     | 72    | 0 | 0.9%  | 1.2%  | Orthopedics | 8.80  | 11.52 |
| 27310 | Exploration of knee joint    | 49    | 4 | 8.5%  | 10.6% | Orthopedics | 10.00 | 12.70 |
| 27442 | Revision of knee joint       | 87    | 1 | 1.6%  | 3.9%  | Orthopedics | 12.37 | 15.05 |
| 24363 | Replace elbow joint          | 158   | 2 | 1.8%  | 1.8%  | Orthopedics | 22.00 | 24.65 |
| 27695 | Repair of ankle ligament     | 58    | 0 | 0.8%  | 0.0%  | Orthopedics | 6.70  | 9.26  |
| 25545 | Treat fracture of ulna       | 64.5  | 0 | 0.0%  | 1.4%  | Orthopedics | 7.94  | 10.47 |
| 26615 | Treat metacarpal fracture    | 58    | 0 | 1.0%  | 0.8%  | Orthopedics | 7.07  | 9.46  |
| 27513 | Treatment of thigh fracture  | 108   | 4 | 2.2%  | 10.1% | Orthopedics | 19.25 | 21.63 |

|       |                              |      |   |       |       |             |       |       |
|-------|------------------------------|------|---|-------|-------|-------------|-------|-------|
| 27524 | Treat kneecap fracture       | 71   | 1 | 3.0%  | 3.2%  | Orthopedics | 10.37 | 12.73 |
| 24341 | Repair arm tendon/muscle     | 75   | 0 | 0.4%  | 0.7%  | Orthopedics | 9.49  | 11.80 |
| 24105 | Removal of elbow bursa       | 30   | 0 | 4.3%  | 5.2%  | Orthopedics | 3.78  | 5.94  |
| 27603 | Drain lower leg lesion       | 26   | 3 | 11.0% | 8.6%  | Orthopedics | 5.23  | 7.36  |
| 27590 | Amputate leg at thigh        | 69.5 | 4 | 6.3%  | 15.2% | Orthopedics | 13.47 | 15.58 |
| 27248 | Treat thigh fracture         | 53   | 3 | 2.4%  | 9.6%  | Orthopedics | 10.78 | 12.86 |
| 25405 | Repair/graft radius or ulna  | 110  | 0 | 0.7%  | 3.6%  | Orthopedics | 15.01 | 17.03 |
| 23462 | Repair shoulder capsule      | 117  | 0 | 1.9%  | 1.9%  | Orthopedics | 15.72 | 17.65 |
| 27301 | Drain thigh/knee lesion      | 29   | 3 | 7.6%  | 10.4% | Orthopedics | 6.78  | 8.70  |
| 27880 | Amputation of lower leg      | 69   | 5 | 6.4%  | 11.5% | Orthopedics | 15.37 | 17.26 |
| 26410 | Repair hand tendon           | 40   | 0 | 0.7%  | 0.0%  | Orthopedics | 4.77  | 6.63  |
| 27759 | Treatment of tibia fracture  | 88   | 2 | 0.7%  | 4.2%  | Orthopedics | 14.45 | 16.29 |
| 27814 | Treatment of ankle fracture  | 69   | 1 | 1.2%  | 2.5%  | Orthopedics | 10.62 | 12.36 |
| 26418 | Repair finger tendon         | 35   | 0 | 0.8%  | 0.8%  | Orthopedics | 4.47  | 6.07  |
| 25111 | Remove wrist tendon lesion   | 29   | 0 | 0.5%  | 0.5%  | Orthopedics | 3.53  | 5.08  |
| 27536 | Treat knee fracture          | 109  | 2 | 1.7%  | 3.2%  | Orthopedics | 17.39 | 18.93 |
| 27602 | Decompression of lower leg   | 54   | 0 | 3.1%  | 3.1%  | Orthopedics | 7.82  | 9.30  |
| 25400 | Repair radius or ulna        | 82   | 0 | 0.0%  | 0.7%  | Orthopedics | 11.28 | 12.75 |
| 29846 | Wrist arthroscopy/surgery    | 51   | 0 | 0.3%  | 0.0%  | Orthopedics | 6.89  | 8.23  |
| 63005 | Remove spine lamina 1/2 Imbr | 101  | 2 | 0.5%  | 2.0%  | Orthopedics | 16.43 | 17.66 |
| 26540 | Repair hand joint            | 48   | 0 | 1.0%  | 0.0%  | Orthopedics | 6.60  | 7.82  |
| 25628 | Treat wrist bone fracture    | 68   | 0 | 0.9%  | 0.9%  | Orthopedics | 9.67  | 10.89 |
| 64708 | Revise arm/leg nerve         | 44   | 0 | 1.9%  | 0.9%  | Orthopedics | 6.36  | 7.46  |
| 27030 | Drainage of hip joint        | 59   | 5 | 11.2% | 11.2% | Orthopedics | 13.65 | 14.68 |
| 63051 | C-laminoplasty w/graft/plate | 159  | 3 | 0.9%  | 5.5%  | Orthopedics | 25.51 | 26.43 |
| 25320 | Repair/revise wrist joint    | 85   | 0 | 1.6%  | 3.1%  | Orthopedics | 12.75 | 13.67 |
| 27438 | Revise kneecap with implant  | 73   | 1 | 2.5%  | 1.9%  | Orthopedics | 11.89 | 12.79 |
| 27340 | Removal of kneecap bursa     | 28   | 0 | 5.9%  | 2.9%  | Orthopedics | 4.32  | 5.16  |
| 27827 | Treat lower leg fracture     | 94   | 1 | 0.3%  | 1.5%  | Orthopedics | 14.79 | 15.55 |
| 25607 | Treat fx rad extra-articul   | 63   | 0 | 0.7%  | 1.4%  | Orthopedics | 9.56  | 10.29 |
| 27792 | Treatment of ankle fracture  | 57   | 0 | 1.0%  | 1.5%  | Orthopedics | 8.75  | 9.47  |
| 27784 | Treatment of fibula fracture | 64   | 0 | 1.9%  | 0.9%  | Orthopedics | 9.67  | 10.35 |
| 22558 | Lumbar spine fusion          | 155  | 2 | 0.0%  | 1.4%  | Orthopedics | 23.53 | 24.16 |
| 27766 | Optx medial ankle fx         | 50   | 0 | 0.4%  | 2.0%  | Orthopedics | 7.89  | 8.51  |
| 24342 | Repair of ruptured tendon    | 72   | 0 | 0.7%  | 0.9%  | Orthopedics | 10.86 | 11.45 |
| 25112 | Reremove wrist tendon lesion | 30   | 0 | 0.0%  | 0.6%  | Orthopedics | 4.67  | 5.22  |
| 22554 | Neck spine fusion            | 112  | 1 | 1.8%  | 2.7%  | Orthopedics | 17.69 | 18.15 |
| 29862 | Hip arthr0 w/debridement     | 72   | 0 | 0.4%  | 1.7%  | Orthopedics | 11.17 | 11.60 |
| 27654 | Repair of achilles tendon    | 65   | 0 | 0.9%  | 2.8%  | Orthopedics | 10.53 | 10.83 |
| 27828 | Treat lower leg fracture     | 116  | 1 | 2.2%  | 2.9%  | Orthopedics | 18.43 | 18.69 |

|       |                              |      |   |      |       |             |       |       |
|-------|------------------------------|------|---|------|-------|-------------|-------|-------|
| 26746 | Treat finger fracture each   | 61   | 0 | 2.0% | 1.4%  | Orthopedics | 9.80  | 10.01 |
| 29888 | Knee arthroscopy/surgery     | 94   | 0 | 0.5% | 0.7%  | Orthopedics | 14.30 | 14.39 |
| 27600 | Decompression of lower leg   | 33   | 0 | 2.4% | 2.4%  | Orthopedics | 6.03  | 6.10  |
| 27698 | Repair of ankle ligament     | 61   | 0 | 0.5% | 0.0%  | Orthopedics | 9.61  | 9.68  |
| 27125 | Partial hip replacement      | 71   | 4 | 3.2% | 8.8%  | Orthopedics | 16.64 | 16.64 |
| 25000 | Incision of tendon sheath    | 18   | 0 | 0.8% | 0.9%  | Orthopedics | 3.55  | 3.50  |
| 26951 | Amputation of finger/thumb   | 29   | 0 | 4.1% | 6.6%  | Orthopedics | 6.04  | 5.92  |
| 23455 | Repair shoulder capsule      | 95   | 0 | 0.0% | 0.5%  | Orthopedics | 14.67 | 14.44 |
| 23430 | Repair biceps tendon         | 59   | 0 | 0.0% | 1.6%  | Orthopedics | 10.17 | 9.71  |
| 26727 | Treat finger fracture each   | 27.5 | 0 | 2.0% | 0.7%  | Orthopedics | 5.42  | 4.94  |
| 25608 | Treat fx rad intra-articul   | 65   | 0 | 0.8% | 1.5%  | Orthopedics | 11.07 | 10.58 |
| 27650 | Repair achilles tendon       | 53   | 0 | 0.3% | 0.8%  | Orthopedics | 9.21  | 8.70  |
| 27829 | Treat lower leg joint        | 48   | 0 | 1.0% | 1.8%  | Orthopedics | 8.80  | 8.21  |
| 29873 | Knee arthroscopy/surgery     | 30   | 0 | 2.0% | 2.3%  | Orthopedics | 6.24  | 5.64  |
| 25447 | Repair wrist joints          | 64   | 0 | 0.5% | 0.6%  | Orthopedics | 11.14 | 10.25 |
| 23120 | Partial removal collar bone  | 38   | 0 | 0.4% | 0.4%  | Orthopedics | 7.39  | 6.42  |
| 27495 | Reinforce thigh              | 72   | 3 | 1.9% | 9.2%  | Orthopedics | 16.54 | 15.57 |
| 27187 | Reinforce hip bones          | 55   | 3 | 1.3% | 9.0%  | Orthopedics | 14.23 | 13.15 |
| 26952 | Amputation of finger/thumb   | 25   | 0 | 4.1% | 8.9%  | Orthopedics | 6.48  | 5.38  |
| 29824 | Shoulder arthroscopy/surgery | 47   | 0 | 0.2% | 1.0%  | Orthopedics | 8.98  | 7.87  |
| 63047 | Remove spine lamina 1 Imbr   | 81   | 1 | 2.7% | 3.9%  | Orthopedics | 15.37 | 14.23 |
| 29822 | Shoulder arthroscopy/surgery | 36   | 0 | 0.8% | 1.4%  | Orthopedics | 7.60  | 6.35  |
| 27687 | Revision of calf tendon      | 28   | 0 | 0.6% | 1.3%  | Orthopedics | 6.41  | 5.10  |
| 27236 | Treat thigh fracture         | 68   | 4 | 3.1% | 9.1%  | Orthopedics | 17.61 | 16.23 |
| 27138 | Revise hip joint replacement | 125  | 3 | 6.1% | 8.6%  | Orthopedics | 23.70 | 22.24 |
| 63030 | Low back disk surgery        | 71   | 0 | 2.1% | 2.9%  | Orthopedics | 13.18 | 11.71 |
| 29884 | Knee arthroscopy/surgery     | 39   | 0 | 0.9% | 1.4%  | Orthopedics | 8.28  | 6.80  |
| 29874 | Knee arthroscopy/surgery     | 32   | 0 | 0.9% | 1.2%  | Orthopedics | 7.19  | 5.71  |
| 29823 | Shoulder arthroscopy/surgery | 40   | 0 | 0.9% | 0.6%  | Orthopedics | 8.36  | 6.78  |
| 24358 | Repair elbow w/deb open      | 28   | 0 | 1.0% | 1.0%  | Orthopedics | 6.66  | 5.06  |
| 28805 | Amputation thru metatarsal   | 47.5 | 3 | 8.7% | 12.4% | Orthopedics | 12.71 | 11.07 |
| 29875 | Knee arthroscopy/surgery     | 25   | 0 | 2.0% | 1.8%  | Orthopedics | 6.45  | 4.79  |
| 29825 | Shoulder arthroscopy/surgery | 36   | 0 | 0.4% | 0.4%  | Orthopedics | 7.79  | 6.11  |
| 27635 | Remove lower leg bone lesion | 35   | 0 | 0.0% | 1.0%  | Orthopedics | 8.03  | 6.07  |
| 28445 | Treat ankle fracture         | 91   | 0 | 0.0% | 0.0%  | Orthopedics | 15.76 | 13.80 |
| 23470 | Reconstruct shoulder joint   | 94   | 1 | 1.1% | 2.7%  | Orthopedics | 17.89 | 15.80 |
| 23412 | Repair rotator cuff chronic  | 57   | 0 | 1.3% | 2.8%  | Orthopedics | 11.93 | 9.70  |
| 27137 | Revise hip joint replacement | 109  | 3 | 6.4% | 7.5%  | Orthopedics | 22.70 | 20.14 |
| 23410 | Repair rotator cuff acute    | 54   | 0 | 0.3% | 0.6%  | Orthopedics | 11.39 | 8.81  |
| 29880 | Knee arthroscopy/surgery     | 26   | 0 | 0.4% | 1.0%  | Orthopedics | 7.39  | 4.73  |



|       |                              |       |   |      |      |                      |       |       |
|-------|------------------------------|-------|---|------|------|----------------------|-------|-------|
| 29881 | Knee arthroscopy/surgery     | 24    | 0 | 0.3% | 0.6% | Orthopedics          | 7.03  | 4.33  |
| 29882 | Knee arthroscopy/surgery     | 41    | 0 | 0.2% | 0.4% | Orthopedics          | 9.60  | 6.85  |
| 27506 | Treatment of thigh fracture  | 73    | 4 | 2.2% | 6.2% | Orthopedics          | 19.65 | 16.85 |
| 27487 | Revise/replace knee joint    | 140   | 3 | 3.0% | 5.2% | Orthopedics          | 27.11 | 24.18 |
| 29876 | Knee arthroscopy/surgery     | 32    | 0 | 2.7% | 1.8% | Orthopedics          | 8.87  | 5.83  |
| 27132 | Total hip arthroplasty       | 127   | 3 | 4.7% | 6.9% | Orthopedics          | 25.69 | 22.60 |
| 29828 | Arthroscopy biceps tenodesis | 62    | 0 | 0.4% | 0.8% | Orthopedics          | 13.16 | 9.99  |
| 29879 | Knee arthroscopy/surgery     | 33    | 0 | 0.2% | 0.2% | Orthopedics          | 8.99  | 5.61  |
| 25609 | Treat fx radial 3+ frag      | 67    | 0 | 0.9% | 1.6% | Orthopedics          | 14.38 | 10.89 |
| 29877 | Knee arthroscopy/surgery     | 26    | 0 | 0.9% | 1.2% | Orthopedics          | 8.30  | 4.79  |
| 24359 | Repair elbow deb/atrch open  | 31    | 0 | 0.7% | 0.7% | Orthopedics          | 8.98  | 5.44  |
| 29827 | Arthroscop rotator cuff repr | 75    | 0 | 0.2% | 1.2% | Orthopedics          | 15.59 | 11.90 |
| 23420 | Repair of shoulder           | 62    | 0 | 0.0% | 0.0% | Orthopedics          | 13.54 | 9.79  |
| 29806 | Shoulder arthroscopy/surgery | 72    | 0 | 0.2% | 0.4% | Orthopedics          | 15.14 | 11.32 |
| 27446 | Revision of knee joint       | 79    | 1 | 0.8% | 1.8% | Orthopedics          | 17.48 | 13.60 |
| 27269 | Optx thigh fx                | 58    | 4 | 1.7% | 9.0% | Orthopedics          | 18.89 | 14.83 |
| 29807 | Shoulder arthroscopy/surgery | 66    | 0 | 0.2% | 0.3% | Orthopedics          | 14.67 | 10.45 |
| 63042 | Laminotomy single lumbar     | 83    | 1 | 3.8% | 4.4% | Orthopedics          | 18.76 | 14.50 |
| 27245 | Treat thigh fracture         | 49    | 4 | 1.8% | 8.0% | Orthopedics          | 18.18 | 13.52 |
| 27486 | Revise/replace knee joint    | 87    | 2 | 2.7% | 5.0% | Orthopedics          | 21.12 | 16.24 |
| 27244 | Treat thigh fracture         | 48    | 4 | 2.1% | 6.9% | Orthopedics          | 18.18 | 13.33 |
| 27130 | Total hip arthroplasty       | 84    | 2 | 1.9% | 3.4% | Orthopedics          | 20.72 | 15.64 |
| 23472 | Reconstruct shoulder joint   | 102   | 1 | 1.4% | 3.1% | Orthopedics          | 22.13 | 16.92 |
| 27447 | Total knee arthroplasty      | 83    | 2 | 1.1% | 3.1% | Orthopedics          | 20.72 | 15.47 |
| 63267 | Excise intrspinl lesion lmb  | 80    | 1 | 0.8% | 2.3% | Orthopedics          | 19.45 | 13.83 |
| 22551 | Neck spine fuse&remov bel c2 | 115.5 | 1 | 1.9% | 4.8% | Orthopedics          | 25.00 | 18.90 |
| 27254 | Treat hip dislocation        | 53    | 3 | 3.2% | 7.7% | Orthopedics          | 18.94 | 12.82 |
| 29883 | Knee arthroscopy/surgery     | 32    | 0 | 0.0% | 1.0% | Orthopedics          | 11.77 | 5.62  |
| 23473 | Revis reconst shoulder joint | 106   | 1 | 4.2% | 7.9% | Orthopedics          | 25.00 | 17.79 |
| 27134 | Revise hip joint replacement | 128   | 3 | 6.3% | 8.1% | Orthopedics          | 30.28 | 22.57 |
| 23474 | Revis reconst shoulder joint | 118   | 1 | 3.5% | 3.5% | Orthopedics          | 27.21 | 19.00 |
| 22856 | Cerv artific diskectomy      | 87    | 1 | 0.6% | 0.9% | Orthopedics          | 24.05 | 14.49 |
| 63056 | Decompress spinal cord lmb   | 62.5  | 0 | 1.4% | 0.9% | Orthopedics          | 21.86 | 10.14 |
| 60280 | Remove thyroid duct lesion   | 76    | 0 | 1.1% | 0.8% | Otolaryngology (ENT) | 6.16  | 12.00 |
| 42440 | Excise submaxillary gland    | 73    | 0 | 0.9% | 2.0% | Otolaryngology (ENT) | 6.14  | 11.81 |
| 42815 | Excision of neck cyst        | 83    | 0 | 0.0% | 0.8% | Otolaryngology (ENT) | 7.31  | 12.91 |
| 69642 | Revise middle ear & mastoid  | 161   | 0 | 0.0% | 0.7% | Otolaryngology (ENT) | 17.06 | 22.63 |
| 42410 | Excise parotid gland/lesion  | 97    | 0 | 0.9% | 0.4% | Otolaryngology (ENT) | 9.57  | 14.75 |
| 21462 | Treat lower jaw fracture     | 102   | 0 | 2.7% | 2.7% | Otolaryngology (ENT) | 11.01 | 15.86 |
| 69645 | Revise middle ear & mastoid  | 150   | 0 | 0.6% | 0.6% | Otolaryngology (ENT) | 16.71 | 21.38 |

|       |                              |       |   |       |       |                      |       |       |
|-------|------------------------------|-------|---|-------|-------|----------------------|-------|-------|
| 42330 | Removal of salivary stone    | 36    | 0 | 0.0%  | 1.8%  | Otolaryngology (ENT) | 2.26  | 6.39  |
| 60240 | Removal of thyroid           | 120   | 1 | 1.1%  | 2.5%  | Otolaryngology (ENT) | 15.04 | 19.12 |
| 69644 | Revise middle ear & mastoid  | 146.5 | 0 | 0.9%  | 0.9%  | Otolaryngology (ENT) | 17.23 | 21.05 |
| 60210 | Partial thyroid excision     | 88    | 1 | 1.3%  | 2.9%  | Otolaryngology (ENT) | 11.23 | 15.03 |
| 21501 | Drain neck/chest lesion      | 26    | 3 | 9.4%  | 4.5%  | Otolaryngology (ENT) | 3.98  | 7.57  |
| 60220 | Partial removal of thyroid   | 84    | 1 | 0.9%  | 1.6%  | Otolaryngology (ENT) | 11.19 | 14.25 |
| 42415 | Excise parotid gland/lesion  | 126   | 1 | 0.9%  | 1.3%  | Otolaryngology (ENT) | 17.16 | 19.64 |
| 60254 | Extensive thyroid surgery    | 216   | 2 | 4.6%  | 2.6%  | Otolaryngology (ENT) | 28.42 | 30.84 |
| 40812 | Excise/repair mouth lesion   | 25    | 0 | 0.8%  | 0.8%  | Otolaryngology (ENT) | 2.37  | 4.54  |
| 42420 | Excise parotid gland/lesion  | 143   | 1 | 1.2%  | 1.1%  | Otolaryngology (ENT) | 19.53 | 21.66 |
| 42700 | Drainage of tonsil abscess   | 12    | 1 | 3.1%  | 1.5%  | Otolaryngology (ENT) | 1.67  | 3.68  |
| 60271 | Removal of thyroid           | 123   | 1 | 2.3%  | 2.3%  | Otolaryngology (ENT) | 17.62 | 19.47 |
| 69631 | Repair eardrum structures    | 75    | 0 | 0.1%  | 0.7%  | Otolaryngology (ENT) | 10.05 | 11.78 |
| 42831 | Removal of adenoids          | 22    | 0 | 0.0%  | 1.9%  | Otolaryngology (ENT) | 2.81  | 4.27  |
| 41112 | Excision of tongue lesion    | 19    | 0 | 0.4%  | 3.0%  | Otolaryngology (ENT) | 2.83  | 4.04  |
| 21390 | Opn tx orbit periorbtl implt | 78    | 0 | 1.9%  | 1.0%  | Otolaryngology (ENT) | 11.23 | 12.32 |
| 69610 | Repair of eardrum            | 31.5  | 0 | 0.8%  | 0.8%  | Otolaryngology (ENT) | 4.47  | 5.55  |
| 69633 | Rebuild eardrum structures   | 87    | 0 | 0.0%  | 0.4%  | Otolaryngology (ENT) | 12.31 | 13.34 |
| 42826 | Removal of tonsils           | 20    | 0 | 3.7%  | 2.6%  | Otolaryngology (ENT) | 3.45  | 4.09  |
| 42821 | Remove tonsils and adenoids  | 23    | 0 | 3.8%  | 2.7%  | Otolaryngology (ENT) | 4.36  | 4.57  |
| 60225 | Partial removal of thyroid   | 88    | 1 | 0.0%  | 2.3%  | Otolaryngology (ENT) | 14.79 | 14.88 |
| 69632 | Rebuild eardrum structures   | 83    | 0 | 0.5%  | 0.0%  | Otolaryngology (ENT) | 12.96 | 12.75 |
| 42145 | Repair palate pharynx/uvula  | 44    | 1 | 2.8%  | 2.8%  | Otolaryngology (ENT) | 9.78  | 8.80  |
| 38724 | Removal of lymph nodes neck  | 148   | 1 | 3.6%  | 5.3%  | Otolaryngology (ENT) | 23.95 | 22.87 |
| 60252 | Removal of thyroid           | 130   | 1 | 1.4%  | 3.2%  | Otolaryngology (ENT) | 22.01 | 20.50 |
| 60500 | Explore parathyroid glands   | 82    | 0 | 0.7%  | 2.4%  | Otolaryngology (ENT) | 15.60 | 13.11 |
| 41120 | Partial removal of tongue    | 48    | 0 | 2.0%  | 3.1%  | Otolaryngology (ENT) | 11.14 | 8.45  |
| 60260 | Repeat thyroid surgery       | 78.5  | 1 | 0.4%  | 1.8%  | Otolaryngology (ENT) | 18.26 | 13.51 |
| 19361 | Breast reconstr w/lat flap   | 220   | 2 | 4.6%  | 2.3%  | Plastics             | 23.36 | 31.17 |
| 19316 | Suspension of breast         | 122   | 0 | 1.7%  | 1.7%  | Plastics             | 11.09 | 18.24 |
| 19300 | Removal of breast tissue     | 74    | 0 | 1.7%  | 1.1%  | Plastics             | 5.31  | 11.79 |
| 19364 | Breast reconstruction        | 449   | 4 | 11.0% | 4.3%  | Plastics             | 42.58 | 47.13 |
| 19318 | Reduction of large breast    | 152   | 0 | 1.8%  | 1.5%  | Plastics             | 16.03 | 21.84 |
| 21462 | Treat lower jaw fracture     | 102   | 1 | 5.9%  | 3.9%  | Plastics             | 11.01 | 16.76 |
| 11042 | Deb subq tissue 20 sq cm/<   | 30    | 1 | 6.5%  | 6.0%  | Plastics             | 1.01  | 6.72  |
| 11043 | Deb musc/fascia 20 sq cm/<   | 26    | 3 | 6.5%  | 12.9% | Plastics             | 2.70  | 8.26  |
| 20926 | Removal of tissue for graft  | 65    | 0 | 0.5%  | 0.5%  | Plastics             | 5.79  | 10.36 |
| 11044 | Deb bone 20 sq cm/<          | 27    | 3 | 6.5%  | 10.8% | Plastics             | 4.10  | 8.58  |
| 15830 | Exc skin abd                 | 129   | 1 | 4.4%  | 6.3%  | Plastics             | 17.11 | 20.61 |
| 19371 | Removal of breast capsule    | 81    | 0 | 2.5%  | 3.5%  | Plastics             | 10.62 | 13.18 |

|       |                              |       |   |       |       |          |       |       |
|-------|------------------------------|-------|---|-------|-------|----------|-------|-------|
| 15734 | Muscle-skin graft trunk      | 125   | 3 | 8.2%  | 7.5%  | Plastics | 19.86 | 21.83 |
| 26735 | Treat finger fracture each   | 55    | 0 | 2.1%  | 2.1%  | Plastics | 7.42  | 9.30  |
| 19380 | Revise breast reconstruction | 78    | 0 | 1.2%  | 0.8%  | Plastics | 10.41 | 12.27 |
| 19325 | Enlarge breast with implant  | 65    | 0 | 0.9%  | 0.4%  | Plastics | 8.64  | 10.36 |
| 25111 | Remove wrist tendon lesion   | 28    | 0 | 0.0%  | 0.6%  | Plastics | 3.53  | 4.93  |
| 26615 | Treat metacarpal fracture    | 51    | 0 | 1.6%  | 0.5%  | Plastics | 7.07  | 8.40  |
| 19350 | Breast reconstruction        | 63    | 0 | 0.0%  | 0.4%  | Plastics | 9.11  | 10.04 |
| 19328 | Removal of breast implant    | 42    | 0 | 2.5%  | 0.5%  | Plastics | 6.48  | 7.06  |
| 19120 | Removal of breast lesion     | 36    | 0 | 0.8%  | 1.6%  | Plastics | 5.92  | 6.38  |
| 19342 | Delayed breast prosthesis    | 81    | 0 | 1.9%  | 2.9%  | Plastics | 12.63 | 13.09 |
| 26951 | Amputation of finger/thumb   | 30    | 0 | 1.5%  | 7.6%  | Plastics | 6.04  | 6.20  |
| 26727 | Treat finger fracture each   | 27    | 0 | 2.4%  | 1.6%  | Plastics | 5.42  | 5.04  |
| 26540 | Repair hand joint            | 37    | 0 | 0.0%  | 0.0%  | Plastics | 6.60  | 6.14  |
| 25447 | Repair wrist joints          | 65.5  | 0 | 0.0%  | 1.5%  | Plastics | 11.14 | 10.62 |
| 19340 | Immediate breast prosthesis  | 80.5  | 0 | 3.9%  | 3.9%  | Plastics | 13.99 | 13.10 |
| 21390 | Opn tx orbit periorbtl implt | 56    | 0 | 2.9%  | 2.9%  | Plastics | 11.23 | 9.56  |
| 15260 | Skin full graft een & lips   | 52    | 0 | 0.6%  | 1.7%  | Plastics | 11.64 | 8.76  |
| 19357 | Breast reconstruction        | 87    | 0 | 4.3%  | 4.3%  | Plastics | 18.50 | 14.01 |
| 14301 | Tis trnfr any 30.1-60 sq cm  | 48    | 0 | 0.0%  | 0.5%  | Plastics | 12.65 | 7.90  |
| 19366 | Breast reconstruction        | 80    | 0 | 1.1%  | 2.6%  | Plastics | 21.84 | 12.89 |
| 32609 | Thoracoscopy w/bx pleura     | 52    | 2 | 3.9%  | 12.5% | Thoracic | 4.58  | 11.31 |
| 32505 | Wedge resect of lung initial | 108   | 4 | 1.8%  | 4.6%  | Thoracic | 15.75 | 21.39 |
| 32608 | Thoracoscopy w/bx nodule     | 58    | 2 | 1.9%  | 6.1%  | Thoracic | 6.84  | 12.33 |
| 32607 | Thoracoscopy w/bx infiltrate | 43    | 2 | 1.4%  | 6.4%  | Thoracic | 5.50  | 10.15 |
| 43117 | Partial removal of esophagus | 310.5 | 9 | 14.2% | 9.1%  | Thoracic | 43.65 | 46.64 |
| 32480 | Partial removal of lung      | 154   | 5 | 5.5%  | 6.2%  | Thoracic | 25.82 | 28.27 |
| 32673 | Thoracoscopy w/thymus resect | 147.5 | 2 | 0.0%  | 2.8%  | Thoracic | 21.13 | 23.55 |
| 32662 | Thoracoscopy w/mediast exc   | 94    | 2 | 0.8%  | 2.4%  | Thoracic | 14.99 | 16.81 |
| 32663 | Thoracoscopy w/lobectomy     | 147   | 4 | 2.5%  | 5.4%  | Thoracic | 24.64 | 26.28 |
| 32650 | Thoracoscopy w/pleurodesis   | 41    | 4 | 4.0%  | 11.9% | Thoracic | 10.83 | 12.15 |
| 33025 | Incision of heart sac        | 41.5  | 6 | 4.4%  | 12.5% | Thoracic | 13.70 | 14.87 |
| 43280 | Laparoscopy fundoplasty      | 117   | 1 | 1.8%  | 5.3%  | Thoracic | 18.10 | 19.14 |
| 32651 | Thoracoscopy remove cortex   | 74    | 6 | 5.5%  | 12.7% | Thoracic | 18.78 | 19.39 |
| 32666 | Thoracoscopy w/wedge resect  | 65    | 2 | 1.1%  | 5.0%  | Thoracic | 14.50 | 13.20 |
| 32655 | Thoracoscopy resect bullae   | 57    | 4 | 5.0%  | 5.6%  | Thoracic | 16.17 | 14.36 |
| 32669 | Thoracoscopy remove segment  | 117   | 3 | 1.2%  | 4.0%  | Thoracic | 23.53 | 21.22 |
| 32220 | Release of lung              | 108   | 6 | 0.9%  | 10.6% | Thoracic | 26.65 | 24.33 |
| 43281 | Lap paraesophag hern repair  | 139   | 2 | 2.5%  | 5.9%  | Thoracic | 26.60 | 22.97 |
| 32652 | Thoracoscopy rem totl cortex | 85    | 6 | 6.5%  | 7.9%  | Thoracic | 29.13 | 20.94 |
| 38780 | Remove abdomen lymph nodes   | 281   | 4 | 0.0%  | 7.7%  | Urology  | 17.70 | 39.58 |

|       |                              |       |   |       |       |         |       |       |
|-------|------------------------------|-------|---|-------|-------|---------|-------|-------|
| 51590 | Remove bladder/revise tract  | 303   | 7 | 5.0%  | 14.6% | Urology | 36.33 | 44.95 |
| 55821 | Removal of prostate          | 124   | 3 | 1.8%  | 4.8%  | Urology | 15.76 | 22.20 |
| 57425 | Laparoscopy surg colpopexy   | 150   | 1 | 2.8%  | 3.7%  | Urology | 17.03 | 22.96 |
| 50548 | Laparo remove w/ureter       | 201   | 3 | 3.6%  | 10.2% | Urology | 25.36 | 31.09 |
| 50220 | Remove kidney open           | 130   | 4 | 1.9%  | 6.7%  | Urology | 18.68 | 24.35 |
| 50234 | Removal of kidney & ureter   | 172.5 | 4 | 3.5%  | 8.2%  | Urology | 24.05 | 29.32 |
| 55530 | Revise spermatic cord veins  | 66    | 0 | 0.2%  | 0.1%  | Urology | 5.75  | 10.40 |
| 53410 | Reconstruction of urethra    | 139   | 1 | 1.2%  | 3.5%  | Urology | 17.68 | 21.62 |
| 50230 | Removal kidney open radical  | 155   | 4 | 1.4%  | 7.3%  | Urology | 23.81 | 27.36 |
| 50240 | Partial removal of kidney    | 159   | 4 | 4.0%  | 6.6%  | Urology | 24.21 | 27.70 |
| 55100 | Drainage of scrotum abscess  | 15    | 2 | 1.9%  | 2.3%  | Urology | 2.45  | 5.40  |
| 55831 | Removal of prostate          | 103.5 | 3 | 4.8%  | 6.5%  | Urology | 17.19 | 19.59 |
| 53445 | Insert uro/ves nck sphincter | 86    | 1 | 2.5%  | 4.2%  | Urology | 13.00 | 14.95 |
| 54520 | Removal of testis            | 38    | 0 | 1.9%  | 5.0%  | Urology | 5.30  | 7.23  |
| 52630 | Remove prostate regrowth     | 38    | 1 | 2.6%  | 5.9%  | Urology | 6.55  | 8.29  |
| 51597 | Removal of pelvic structures | 310   | 7 | 6.6%  | 19.0% | Urology | 42.86 | 44.30 |
| 52649 | Prostate laser enucleation   | 93    | 1 | 2.1%  | 4.7%  | Urology | 14.56 | 15.95 |
| 50546 | Laparoscopic nephrectomy     | 141   | 2 | 1.8%  | 5.6%  | Urology | 21.87 | 23.20 |
| 54840 | Remove epididymis lesion     | 38    | 0 | 1.0%  | 0.9%  | Urology | 5.27  | 6.54  |
| 51595 | Remove bladder/revise tract  | 289   | 7 | 5.5%  | 20.2% | Urology | 41.32 | 42.56 |
| 55040 | Removal of hydrocele         | 36    | 0 | 1.3%  | 1.7%  | Urology | 5.45  | 6.42  |
| 55842 | Extensive prostate surgery   | 134   | 2 | 0.7%  | 4.3%  | Urology | 21.36 | 22.19 |
| 55840 | Extensive prostate surgery   | 132   | 2 | 1.5%  | 6.3%  | Urology | 21.36 | 22.17 |
| 55110 | Explore scrotum              | 38.5  | 0 | 5.6%  | 4.8%  | Urology | 6.33  | 7.03  |
| 53447 | Remove/replace ur sphincter  | 86    | 1 | 1.8%  | 3.5%  | Urology | 14.28 | 14.87 |
| 51040 | Incise & drain bladder       | 23    | 0 | 3.1%  | 11.1% | Urology | 4.49  | 5.07  |
| 11004 | Debride genitalia & perineum | 36    | 5 | 11.2% | 7.8%  | Urology | 10.80 | 11.37 |
| 52341 | Cysto w/ureter stricture tx  | 28.5  | 0 | 3.8%  | 7.6%  | Urology | 5.35  | 5.91  |
| 50544 | Laparoscopy pyeloplasty      | 148   | 2 | 2.6%  | 3.8%  | Urology | 23.37 | 23.81 |
| 60650 | Laparoscopy adrenalectomy    | 126   | 2 | 1.6%  | 3.1%  | Urology | 20.73 | 21.06 |
| 55060 | Repair of hydrocele          | 35    | 0 | 1.6%  | 2.0%  | Urology | 6.15  | 6.34  |
| 52240 | Cystoscopy and treatment     | 39    | 0 | 2.9%  | 9.0%  | Urology | 7.50  | 7.56  |
| 55866 | Laparo radical prostatectomy | 184   | 1 | 1.4%  | 3.5%  | Urology | 26.80 | 26.75 |
| 52235 | Cystoscopy and treatment     | 25    | 0 | 2.4%  | 6.4%  | Urology | 5.44  | 5.38  |
| 55041 | Removal of hydroceles        | 46.5  | 0 | 2.3%  | 4.6%  | Urology | 8.54  | 8.43  |
| 54640 | Suspension of testis         | 43    | 0 | 0.5%  | 2.1%  | Urology | 7.73  | 7.50  |
| 52640 | Relieve bladder contracture  | 20    | 0 | 0.9%  | 5.7%  | Urology | 4.79  | 4.54  |
| 57240 | Repair bladder & vagina      | 59.5  | 1 | 1.9%  | 3.8%  | Urology | 11.50 | 11.21 |
| 55845 | Extensive prostate surgery   | 155   | 2 | 2.2%  | 5.5%  | Urology | 25.18 | 24.84 |
| 52234 | Cystoscopy and treatment     | 18    | 0 | 1.6%  | 5.0%  | Urology | 4.62  | 4.18  |

|       |                              |       |    |       |       |          |       |       |
|-------|------------------------------|-------|----|-------|-------|----------|-------|-------|
| 54530 | Removal of testis            | 46    | 0  | 1.1%  | 2.4%  | Urology  | 8.46  | 8.02  |
| 55873 | Cryoablate prostate          | 80    | 0  | 1.3%  | 3.6%  | Urology  | 13.60 | 13.05 |
| 52354 | Cystouretero w/biopsy        | 38    | 0  | 2.8%  | 11.5% | Urology  | 8.00  | 7.33  |
| 54860 | Removal of epididymis        | 33    | 0  | 1.1%  | 2.1%  | Urology  | 6.95  | 6.05  |
| 52344 | Cysto/uretero stricture tx   | 30    | 0  | 4.4%  | 6.8%  | Urology  | 7.05  | 6.06  |
| 54600 | Reduce testis torsion        | 38    | 0  | 0.0%  | 0.7%  | Urology  | 7.64  | 6.46  |
| 50543 | Laparo partial nephrectomy   | 166   | 2  | 1.7%  | 4.5%  | Urology  | 27.41 | 25.99 |
| 50545 | Laparo radical nephrectomy   | 141   | 2  | 1.9%  | 5.3%  | Urology  | 25.06 | 23.16 |
| 52648 | Laser surgery of prostate    | 47    | 0  | 1.3%  | 5.8%  | Urology  | 12.15 | 8.63  |
| 53440 | Male sling procedure         | 60    | 0  | 3.4%  | 1.3%  | Urology  | 13.36 | 9.81  |
| 52500 | Revision of bladder neck     | 21    | 0  | 0.2%  | 4.1%  | Urology  | 8.14  | 4.49  |
| 51596 | Remove bladder/create pouch  | 360.5 | 7  | 6.1%  | 33.1% | Urology  | 44.26 | 41.02 |
| 52601 | Prostatectomy (turp)         | 48    | 1  | 2.1%  | 5.7%  | Urology  | 15.26 | 9.76  |
| 57288 | Repair bladder defect        | 28    | 0  | 1.1%  | 1.4%  | Urology  | 12.13 | 5.16  |
| 50947 | Laparo new ureter/bladder    | 46    | 1  | 2.9%  | 4.9%  | Urology  | 25.78 | 9.37  |
| 21705 | Revision of neck muscle/rib  | 117   | 2  | 3.6%  | 3.6%  | Vascular | 9.92  | 19.96 |
| 27882 | Amputation of lower leg      | 27    | 11 | 12.5% | 15.7% | Vascular | 9.79  | 18.64 |
| 21615 | Removal of rib               | 107.5 | 1  | 2.3%  | 0.9%  | Vascular | 10.45 | 17.23 |
| 35371 | Rechanneling of artery       | 133   | 2  | 7.7%  | 10.4% | Vascular | 15.31 | 21.76 |
| 27889 | Amputation of foot at ankle  | 21    | 10 | 11.9% | 5.9%  | Vascular | 10.86 | 16.65 |
| 27886 | Amputation follow-up surgery | 62    | 5  | 8.3%  | 13.3% | Vascular | 10.02 | 15.74 |
| 11042 | Deb subq tissue 20 sq cm/<   | 19    | 3  | 8.7%  | 13.7% | Vascular | 1.01  | 6.64  |
| 35372 | Rechanneling of artery       | 158.5 | 2  | 9.0%  | 13.5% | Vascular | 18.58 | 24.20 |
| 35621 | Art byp axillary-femoral     | 164   | 5  | 16.3% | 12.7% | Vascular | 21.03 | 25.89 |
| 35903 | Excision graft extremity     | 64    | 4  | 6.8%  | 16.7% | Vascular | 9.53  | 14.44 |
| 35151 | Repair defect of artery      | 176   | 3  | 4.8%  | 7.2%  | Vascular | 23.72 | 28.32 |
| 11043 | Deb musc/fascia 20 sq cm/<   | 21    | 4  | 11.5% | 14.5% | Vascular | 2.70  | 7.23  |
| 35666 | Art byp fem-ant-post tib/prl | 200   | 5  | 17.0% | 19.5% | Vascular | 23.66 | 28.07 |
| 35556 | Art byp grft fem-popliteal   | 206   | 4  | 10.8% | 13.3% | Vascular | 26.75 | 31.25 |
| 49421 | Ins tun ip cath for dial opn | 45    | 0  | 1.5%  | 8.0%  | Vascular | 4.21  | 8.46  |
| 35876 | Removal of clot in graft     | 142   | 4  | 16.3% | 13.2% | Vascular | 17.82 | 21.94 |
| 11044 | Deb bone 20 sq cm/<          | 24    | 4  | 9.5%  | 15.4% | Vascular | 4.10  | 8.19  |
| 37700 | Revise leg vein              | 45    | 0  | 0.0%  | 1.6%  | Vascular | 3.82  | 7.69  |
| 35646 | Art byp aortobifemoral       | 236   | 6  | 12.0% | 8.9%  | Vascular | 32.98 | 36.71 |
| 37220 | Iliac revasc                 | 65    | 0  | 5.8%  | 10.1% | Vascular | 7.90  | 11.06 |
| 35665 | Art byp iliofemoral          | 163   | 3  | 11.5% | 12.6% | Vascular | 22.35 | 25.25 |
| 35656 | Art byp femoral-popliteal    | 147   | 3  | 11.5% | 13.7% | Vascular | 20.47 | 23.26 |
| 34825 | Endovasc extend prosth init  | 90    | 1  | 3.5%  | 4.7%  | Vascular | 12.80 | 15.51 |
| 37224 | Fem/popl revas w/tla         | 67    | 0  | 6.9%  | 10.2% | Vascular | 8.75  | 11.17 |
| 37226 | Fem/popl revasc w/stent      | 76    | 0  | 6.1%  | 11.0% | Vascular | 10.24 | 12.51 |

|       |                              |       |   |       |       |          |       |       |
|-------|------------------------------|-------|---|-------|-------|----------|-------|-------|
| 35661 | Art byp femoral-femoral      | 129   | 3 | 7.2%  | 10.8% | Vascular | 20.35 | 22.49 |
| 49505 | Prp i/hern init reduc >5 yr  | 62    | 0 | 0.0%  | 0.9%  | Vascular | 7.96  | 10.01 |
| 37722 | Ligate/strip long leg vein   | 61    | 0 | 0.5%  | 1.9%  | Vascular | 8.16  | 10.08 |
| 35081 | Repair defect of artery      | 193   | 7 | 6.3%  | 6.2%  | Vascular | 33.53 | 35.36 |
| 35638 | Art byp aortobi-iliac        | 217   | 6 | 10.5% | 9.5%  | Vascular | 33.60 | 35.42 |
| 35606 | Art byp carotid-subclavian   | 154   | 2 | 6.9%  | 12.8% | Vascular | 22.46 | 24.22 |
| 35654 | Art byp axill-fem-femoral    | 202.5 | 5 | 18.1% | 18.5% | Vascular | 26.28 | 27.96 |
| 27880 | Amputation of lower leg      | 65    | 6 | 9.4%  | 14.7% | Vascular | 15.37 | 17.09 |
| 35102 | Repair defect of artery      | 230   | 7 | 9.1%  | 4.1%  | Vascular | 36.53 | 38.24 |
| 34101 | Removal of artery clot       | 58    | 3 | 9.2%  | 8.9%  | Vascular | 10.93 | 12.64 |
| 35091 | Repair defect of artery      | 213   | 7 | 8.7%  | 5.8%  | Vascular | 35.35 | 36.89 |
| 37225 | Fem/popl revas w/ather       | 78    | 1 | 9.0%  | 12.1% | Vascular | 11.75 | 13.13 |
| 27590 | Amputate leg at thigh        | 55    | 5 | 6.6%  | 15.0% | Vascular | 13.47 | 14.84 |
| 37607 | Ligation of a-v fistula      | 39    | 0 | 3.7%  | 10.0% | Vascular | 6.25  | 7.51  |
| 35355 | Rechanneling of artery       | 131   | 2 | 8.7%  | 13.4% | Vascular | 19.86 | 21.05 |
| 37228 | Tib/per revasc w/tla         | 78    | 1 | 9.2%  | 18.8% | Vascular | 10.75 | 11.90 |
| 35571 | Art byp pop-tibl-prl-other   | 220   | 5 | 21.0% | 22.8% | Vascular | 25.52 | 26.56 |
| 37227 | Fem/popl revasc stnt & ather | 97    | 0 | 5.5%  | 5.8%  | Vascular | 14.25 | 15.37 |
| 27596 | Amputation follow-up surgery | 47    | 4 | 8.7%  | 9.4%  | Vascular | 11.29 | 12.41 |
| 35566 | Art byp fem-ant-post tib/prl | 252   | 5 | 17.3% | 17.2% | Vascular | 32.35 | 33.41 |
| 37221 | Iliac revasc w/stent         | 62    | 0 | 4.8%  | 9.1%  | Vascular | 9.75  | 10.78 |
| 36475 | Endovenous rf 1st vein       | 35    | 0 | 0.3%  | 1.9%  | Vascular | 5.30  | 6.28  |
| 36478 | Endovenous laser 1st vein    | 36    | 0 | 0.3%  | 1.2%  | Vascular | 5.30  | 6.27  |
| 49324 | Lap insert tunnel ip cath    | 36    | 0 | 4.3%  | 7.1%  | Vascular | 6.32  | 6.98  |
| 35558 | Art byp grft fem-femoral     | 133   | 3 | 7.6%  | 9.7%  | Vascular | 23.13 | 22.95 |
| 35583 | Vein byp grft fem-popliteal  | 167   | 4 | 9.9%  | 11.2% | Vascular | 27.75 | 27.55 |
| 37765 | Stab phleb veins xtr 10-20   | 43    | 0 | 0.1%  | 1.0%  | Vascular | 7.71  | 7.28  |
| 47562 | Laparoscopic cholecystectomy | 58    | 0 | 0.8%  | 3.9%  | Vascular | 10.47 | 9.99  |
| 35302 | Rechanneling of artery       | 131   | 2 | 10.2% | 12.4% | Vascular | 21.35 | 20.73 |
| 44970 | Laparoscopy appendectomy     | 45    | 1 | 0.0%  | 0.7%  | Vascular | 9.45  | 8.48  |
| 49422 | Remove tunneled ip cath      | 24    | 0 | 2.5%  | 9.3%  | Vascular | 6.29  | 5.30  |
| 37766 | Phleb veins - extrem 20+     | 53    | 0 | 0.4%  | 0.4%  | Vascular | 9.66  | 8.62  |
| 35875 | Removal of clot in graft     | 89    | 3 | 21.4% | 19.3% | Vascular | 10.72 | 9.66  |
| 35883 | Revise graft w/nonauto graft | 138   | 3 | 12.5% | 13.4% | Vascular | 23.15 | 21.87 |
| 49560 | Rpr ventral hern init reduc  | 61    | 0 | 1.0%  | 5.7%  | Vascular | 11.92 | 10.64 |
| 35141 | Repair defect of artery      | 128   | 2 | 12.6% | 16.0% | Vascular | 20.91 | 19.03 |
| 35585 | Vein byp fem-tibial peroneal | 214   | 5 | 16.7% | 17.1% | Vascular | 32.35 | 30.22 |
| 34203 | Removal of leg artery clot   | 103   | 5 | 19.9% | 17.0% | Vascular | 17.86 | 15.70 |
| 28805 | Amputation thru metatarsal   | 39    | 6 | 16.2% | 18.2% | Vascular | 12.71 | 9.97  |
| 35301 | Rechanneling of artery       | 106   | 1 | 3.1%  | 7.0%  | Vascular | 21.16 | 17.83 |

|       |                              |      |   |       |       |          |       |       |
|-------|------------------------------|------|---|-------|-------|----------|-------|-------|
| 34800 | Endovas aaa repr w/sm tube   | 109  | 1 | 4.0%  | 7.4%  | Vascular | 21.54 | 18.18 |
| 37215 | Transcath stent cca w/eps    | 75.5 | 1 | 2.6%  | 6.7%  | Vascular | 17.75 | 13.75 |
| 37229 | Tib/per revasc w/ather       | 64   | 1 | 11.1% | 18.1% | Vascular | 13.80 | 9.55  |
| 34201 | Removal of artery clot       | 77   | 4 | 13.3% | 14.6% | Vascular | 19.48 | 14.74 |
| 36838 | Dist revas ligation hemo     | 120  | 0 | 10.9% | 15.4% | Vascular | 21.69 | 16.69 |
| 35011 | Repair defect of artery      | 79.5 | 1 | 8.0%  | 14.5% | Vascular | 18.58 | 13.29 |
| 49561 | Rpr ventral hern init block  | 56   | 0 | 0.9%  | 0.9%  | Vascular | 15.38 | 9.18  |
| 34802 | Endovas aaa repr w/2-p part  | 103  | 1 | 3.1%  | 7.1%  | Vascular | 23.79 | 17.45 |
| 34804 | Endovas aaa repr w/1-p part  | 97.5 | 1 | 2.3%  | 7.9%  | Vascular | 23.79 | 16.78 |
| 34803 | Endovas aaa repr w/3-p part  | 100  | 1 | 4.6%  | 6.4%  | Vascular | 24.82 | 16.91 |
| 35082 | Repair artery rupture aorta  | 169  | 7 | 11.0% | 3.8%  | Vascular | 42.09 | 31.39 |
| 33881 | Endovasc taa repr w/o subcl  | 89   | 3 | 5.6%  | 8.1%  | Vascular | 29.58 | 17.64 |
| 33880 | Endovasc taa repr incl subcl | 90   | 3 | 6.4%  | 8.3%  | Vascular | 34.58 | 17.66 |

**eFigure 1.** Changing the Sample Size Threshold Required to Include a Procedure in the Regression Model

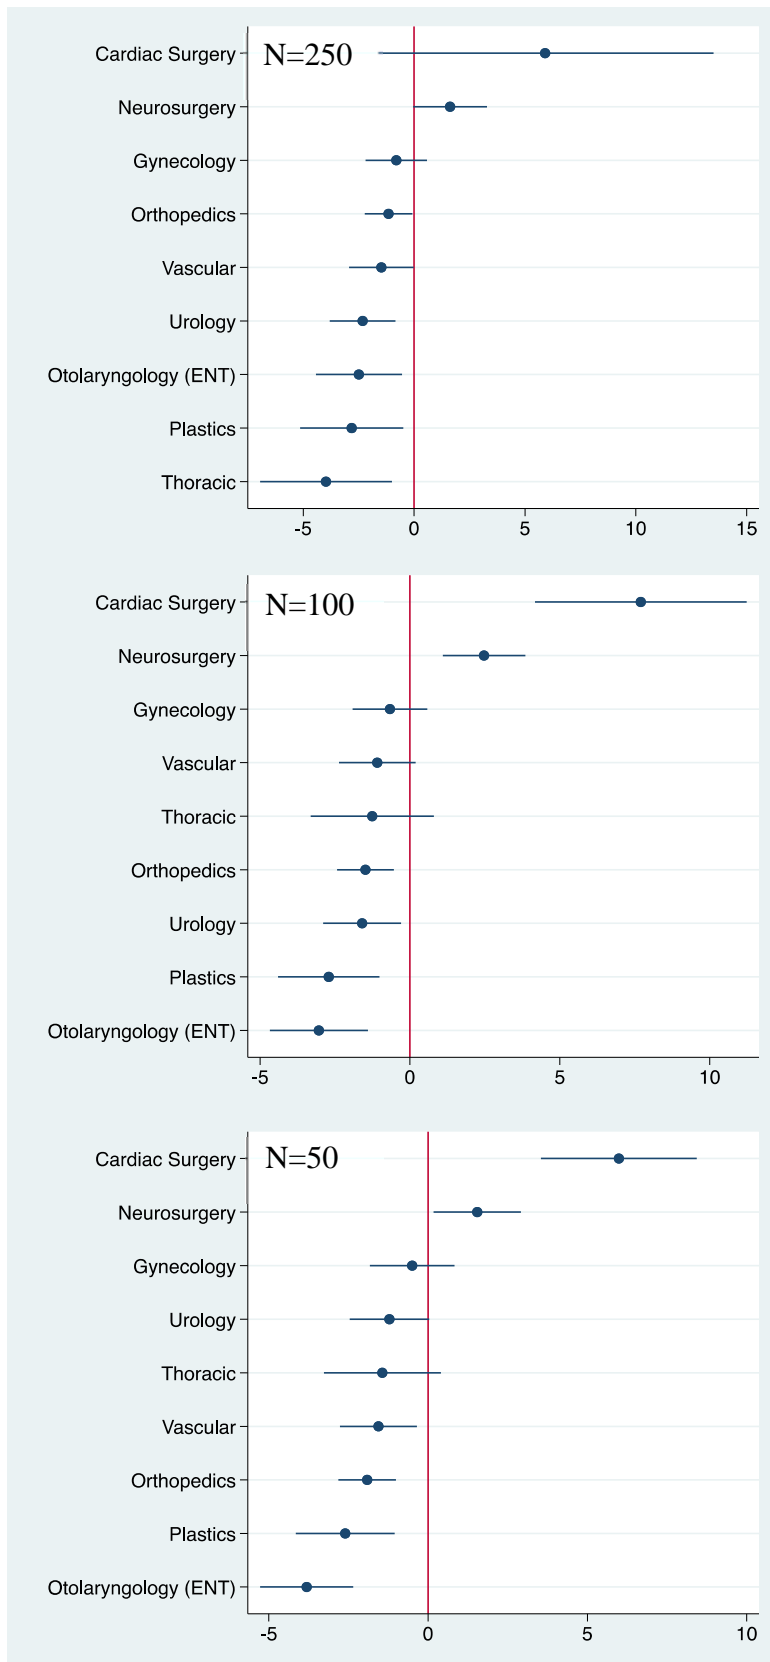



**eFigure 2.** Negative Binomial Regression

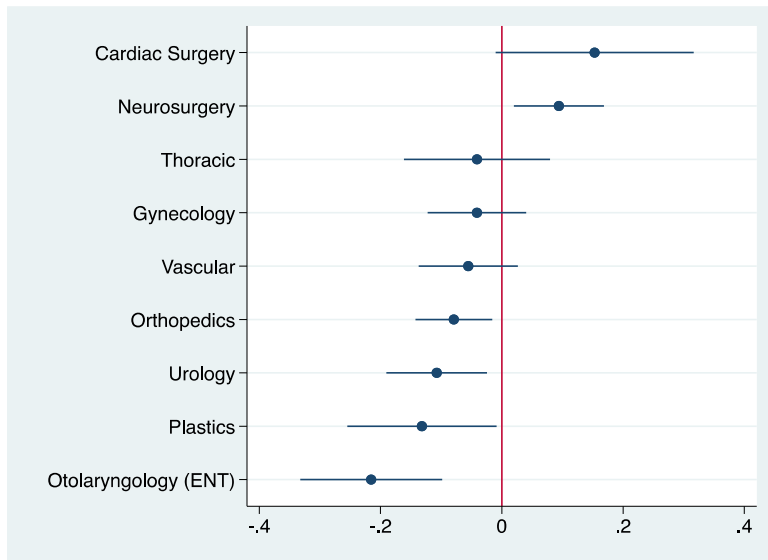

Supplement: jamasurg-154-915-s001.pdf [file jamasurg-154-915-s001.pdf]
